1 **Title:**

2 Artificial anion-conducting channelrhodopsins with tuned spectra, modified kinetics and  
3 enhanced light sensitivity

4

5 **Authors:**

6 Jonas Wietek<sup>a</sup>, Silvia Rodriguez-Rozada<sup>d,1</sup>, Janine Tutas<sup>b,1</sup>, Federico Tenedini<sup>b</sup>, Christiane  
7 Grimm<sup>a</sup>, Thomas G. Oertner<sup>c</sup>, Peter Soba<sup>b</sup>, Peter Hegemann<sup>a</sup>, J. Simon Wiegert<sup>c,d,2</sup>

8

9 **Affiliations:**

10 a) Institute for Biology, Experimental Biophysics, Humboldt-Universität zu Berlin,  
11 Invalidenstraße 42, 10115 Berlin, Germany.

12 b) Research Group Neuronal Patterning and Connectivity, Center for Molecular Neurobiology  
13 Hamburg, Falkenried 94, 20251 Hamburg, Germany.

14 c) Institute for Synaptic Physiology, Center for Molecular Neurobiology Hamburg, Falkenried  
15 94, 20251 Hamburg, Germany.

16 d) Research Group Synaptic Wiring and Information Processing, Center for Molecular  
17 Neurobiology Hamburg, Falkenried 94, 20251 Hamburg, Germany

18 1) Equal contribution

19 2) Correspondence to: [simon.wiegert@zmnh.uni-hamburg.de](mailto:simon.wiegert@zmnh.uni-hamburg.de), phone: +49 40 7410 55354

20

21 **Keywords:**

22 optogenetics, neuronal silencing, anion-conducting channelrhodopsin, channel engineering,  
23 hippocampal neurons, *Drosophila melanogaster*, animal behavior

24

25 Genetic engineering of natural light-gated ion channels has proven a powerful way to  
26 generate optogenetic tools for a wide variety of applications. In recent years, blue light-  
27 activated artificial anion conducting channelrhodopsins (aACRs) have been developed,  
28 improved, and were successfully applied *in vivo*. We asked whether the approaches used to  
29 create aACRs can be transferred to other well-characterized cation-conducting  
30 channelrhodopsins (CCRs) to obtain aACRs with a broad spectrum of biophysical properties.  
31 We generated 22 variants using two conversion strategies applied to 11 CCRs and screened  
32 them for membrane expression, photocurrents and anion selectivity. We obtained two novel  
33 aACRs, Phobos and Aurora, with blue- and red-shifted action spectra and photocurrents  
34 similar to existing aACRs. Furthermore, step-function mutations greatly enhanced light  
35 sensitivity due to a slowed-down photocycle. These bistable aACRs can be reversibly  
36 toggled between open and closed states with brief light pulses of different wavelengths. All  
37 new aACRs reliably inhibited action potential firing in pyramidal CA1 neurons. Expressed in  
38 *Drosophila* larvae *in vivo*, aACRs conveyed robust and specific light-dependent inhibition of  
39 locomotion and nociception.

40

41 **Introduction:**

42 The discovery of natural anion conducting channelrhodopsins (nACRs) <sup>1-4</sup>, and the  
43 development of artificial anion-conducting channelrhodopsins (aACRs) by targeted  
44 mutagenesis of cation-conducting channelrhodopsins (CCRs) <sup>5-8</sup> introduced a new class of  
45 optogenetic tools. The existing aACRs were derived from either *Chlamydomonas reinhardtii*  
46 channelrhodopsin-2 (CrChR2) <sup>8</sup> or the channelrhodopsin chimera C1C2<sup>6</sup> using two  
47 complementary strategies. Exchange of a single glutamate for an arginine in the central gate  
48 of CrChR2 was sufficient to invert ion selectivity. Additional exchange of two glutamate  
49 residues in the outer pore and the inner gate completely eliminated residual proton  
50 conductance, yielding the highly anion-selective aACR iChloC<sup>7</sup>. In parallel, Berndt *et al.*  
51 mutated several amino acids within C1C2 to render the electrostatic potential of the  
52 conducting pore more positive, which strongly favored anion conductance<sup>6</sup>. Further  
53 improvements led to the highly anion selective aACR iC++ and the related step function  
54 version SwiChR++<sup>5</sup>. These improved versions have been successfully used to silence  
55 neurons in mice *in vivo* <sup>5,7,9-12</sup>.

56 We asked whether the approaches used to create aACRs can be transferred to other known  
57 CCRs to obtain aACRs with a broad spectrum of biophysical properties, especially different  
58 kinetics and spectral sensitivities. So far, all aACRs show action spectra similar to CrChR2  
59 with maximal activation in the blue light range. ACRs with a red-shifted absorption maximum  
60 are desirable mainly for three reasons: First, long-wavelength light penetrates deeper into  
61 biological tissue due to lower absorption and scattering <sup>13,14</sup>. This enables silencing of larger  
62 volumes at reduced light energies compared to blue-light activated tools <sup>15</sup>. Second,  
63 combination with blue-light activated tools becomes possible. Third, many animals are blind  
64 to light beyond ~600 nm, while visible light exposure can result in positive or negative  
65 phototaxis, particularly in invertebrates <sup>16,17</sup>. Red light activation avoids or reduces direct  
66 effects of the light pulse on behavior. On the other hand, aACRs with a blue-shifted action  
67 spectrum could be useful in combination with red-shifted sensors and actuators, as their  
68 excitation would not interfere with activation of such ACRs.

69 Adding step-function mutations to spectrally shifted aACRs conveys further benefits: In these  
70 mutants, a long-lasting chloride conductance can be activated by a short light pulse and  
71 terminated by a second light pulse of longer wavelength <sup>5,18,19</sup>. Due to the extremely slow  
72 photocycle, photons are integrated over time, increasing the operational light sensitivity of  
73 target cells by orders of magnitude.

74 Here, we report the successful development of two new aACRs, termed Phobos and Aurora,  
75 which express well in neurons and provide sufficient photocurrents for efficient silencing.

76 Compared to existing aACRs, Phobos and Aurora exhibit blue- and red-shifted action  
77 spectra, making them potentially suitable for dual-wavelength experiments with spectrally  
78 distinct actuators or sensors of the optogenetic toolbox. Adding the step-function mutation  
79 C128A to Aurora, Phobos and the previously published iChloC <sup>7</sup> yielded bi-stable versions  
80 which could be toggled between open and closed states with short light pulses.

81 We characterized the biophysical properties of these new aACRs in HEK cells and verified  
82 their silencing ability in organotypic hippocampal slice cultures. Potent aACR variants were  
83 further tested in larvae of *Drosophila melanogaster*, an organism where the classical light-  
84 activated ion pumps halorhodopsin (NpHR) <sup>20,21</sup> and archaerhodopsin Arch <sup>22</sup> show little  
85 effect. In contrast to eNpHR, light-activation of Aurora in nociceptive class IV dendritic  
86 arborization (C4da) neurons <sup>23</sup> acutely abolished nociceptive behavioral responses and  
87 activation of Aurora or the step-function variant of Phobos in motor neurons reversibly  
88 decreased locomotion.

89

90 **Results:**

91 **Biophysical characterization in HEK cells**

92 To obtain new aACRs with distinct spectral and kinetic properties, we aimed at converting  
93 well-characterized cation-conducting ChRs with known biophysical properties into anion  
94 channels. For this, two distinct, previously successful approaches were taken<sup>5,6,8</sup>. According  
95 to the first approach<sup>8</sup>, we replaced the central gate glutamate (E90R; CrChR2) with arginine  
96 in various ChRs (Figure 1A, B). The new mutants were expressed in HEK cells and tested for  
97 membrane expression and photocurrents. TsChR<sup>E72R</sup> (*Tetraselmis striata* ChR)<sup>39</sup>,  
98 PsChR2<sup>E73R</sup> (*Platymonas subcordiformis* ChR2)<sup>40</sup>, VcChR1<sup>E85R</sup> (*Volvox carteri* ChR1)<sup>41</sup> and  
99 Chronos<sup>E107R</sup> (*Stigeoclonium helveticum* ChR)<sup>39</sup> did not yield detectable photocurrents  
100 (Figure 1B, Figure S2A). Because Chronos exhibits no serine at the homologous position of  
101 S63, which is a main constituent of the inner gate in CrChR2 we speculated that a differently  
102 arranged inner gate could be responsible for the missing photocurrents. Therefore, we  
103 created the double mutant Chronos<sup>A80S E107R</sup> to reconstitute a serine residue at the putative  
104 inner gate while rendering the central gate anion conductive. However, this mutant still  
105 remained non-functional (data not shown). The chimeric ChRs C1C2<sup>E129R</sup><sup>42,43</sup> and C1V1<sup>E129R</sup>  
106<sup>44,45</sup> showed partial Cl<sup>-</sup> conductivity but current amplitudes were below 10 pA and membrane  
107 localization was poor (Figure 1B, Figure S2A). The mutated TcChR (*Tetraselmis cordiformis*  
108 ChR)<sup>39</sup> displayed photocurrents, but the reversal potential was not shifted upon change of  
109 the Cl<sup>-</sup> gradient (Figure 1B, Figure S2A). In case of the red shifted ChRs Chrimson  
110 (*Chlamydomonas noctigama* ChR1)<sup>39</sup> and ReaChR<sup>46</sup> the E90R homologous mutation  
111 caused reduction of photocurrents and a strong reduction of the channel closing time  
112 constant. However, again no (Chrimson) or only minor (ReaChR) shifts of the reversal  
113 potential upon change of the Cl<sup>-</sup> gradient were detected (Figure 1B, Figure S2 A). The only  
114 ChR that could be converted was the highly CrChR2-related CoChR (Figures 1B, S2A and  
115 S10) from *Chloromonas oogama*<sup>5,39</sup>. As shown previously, additional introduction of the  
116 iChloC homologous mutations (CoChR E63Q E70R E81S) further improved the Cl<sup>-</sup> selectivity  
117 (Figures 1B, S3) but neuronal expression revealed toxic side effects<sup>7</sup>. Because the ChloC  
118 conversion strategy (i.e. to replace the homologous glutamate 90 in the inner gate) was not  
119 generalizable to other ChR variants, we proceeded with the second approach and  
120 transferred the mutations and the N-terminal sequence from the aACR iC++<sup>5</sup> to the same  
121 group of ChRs (Figure 1A, B). Most constructs (TcChR, TsChR, PsChR2,<sup>40</sup> Chronos and  
122 Chrimson) showed no photocurrents and only weak expression and/or membrane  
123 localization (Figure S2B). As with the ChloC strategy, CrChR2 and CoChR could be  
124 successfully converted and showed high Cl<sup>-</sup> selectivity. However, both variants showed no  
125 improvements compared to iC++ (Figures 1B, S2B) and were not further investigated.

126 Conversion of the red-shifted ChRs<sup>41</sup> was also successful, but the converted VcChR1 and  
127 C1V1 showed photocurrents below 10 pA. In contrast, the modified ReaChR displayed  
128 robust current amplitudes upon illumination with green light, which were comparable to iC++  
129 photocurrents evoked by blue-light (Figures 1E, S2B). Thus, both engineering strategies  
130 previously used to generate iChloC and iC++ are not generally applicable to convert cation-  
131 conducting ChRs into aACRs. Only CrChR2, CoChR and ReaChR were successfully  
132 transformed with the iC++-based strategy. ReaChR, due to its red-shifted action spectrum, is  
133 a promising new candidate for a green/yellow/red light activated ACR. Since no ChR with  
134 blue-shifted absorption (*TcChR*, *TsChR* and *PsChR2*) could be successfully converted, we  
135 aimed to shift the absorption of iC++ by introducing the mutations T159G and G163A that are  
136 present in all three deep-blue absorbing ChRs<sup>39</sup>. These mutations induced a blue-shift when  
137 the homologous mutations were used in the parental C1C2 construct<sup>47</sup>. The double mutant  
138 iC++<sup>T159G G163A</sup> indeed showed blue-shifted maximal activity (Figure 1C) without altering  
139 photocurrent amplitudes and membrane expression compared to iC++ (Figures 1D, S2B).

140 In summary, our screen of 22 different putatively anion-selective constructs yielded two  
141 functional aACRs with novel properties, namely the blue-shifted iC++<sup>T159G G163A</sup>, which we  
142 termed Phobos and the red-shifted anion-selective ReaChR variant, which we termed  
143 Aurora.

144 We next characterized the biophysical properties of Phobos and Aurora in HEK cells  
145 alongside the two established aACRs iC++ and iChloC. Phobos showed photocurrent  
146 properties similar to the parental iC++. Light application evoked fast currents that decayed to  
147 a stationary level. After light shutoff the current rapidly decayed to baseline with a time  
148 constant of  $10.1 \pm 0.8$  ms (Figure 1D). Aurora, like the parental ReaChR<sup>46</sup>, showed higher  
149 inactivation and slower *off*-kinetics ( $264 \pm 19$  ms). As previously demonstrated for ReaChR  
150<sup>46,48</sup>, high stationary currents could also be evoked with orange light (590 nm), where no fast  
151 peak current is observed, making Aurora suitable for red-shifted activation (Figure 1E).

152 The action spectrum maxima of the new ACRs were substantially shifted to 467 nm ( $n = 6$ ,  
153 Phobos), and 517 nm ( $n = 5$ , Aurora) compared to the maxima of iC++ and iChloC, which  
154 were at 488 nm ( $n = 9$ ) and 494 nm ( $n = 6$ ), respectively (Figure 1C). Thus, the T159G  
155 G163A mutations resulted in a 22 nm blue-shift with respect to the parental iC++. When  
156 longer light pulses (500 ms) with 10-fold increased photon irradiance were used, the action  
157 spectrum of Aurora broadened, revealing two peaks at 419 nm and 585 nm ( $n = 6$ ). The  
158 central part of the spectrum showed a minimum in the region where the low intensity  
159 spectrum was maximal (Figure 1C), possibly caused by inactivation due to absorption of the  
160 ground and conducting state in the same spectral range<sup>48</sup>.

161 Next, we aimed to slow down the photocycle of iChloC, Phobos and Aurora to create  
162 bi-stable aACRs with high operational light sensitivity<sup>5,18,19</sup>. Previously, introduction of the  
163 C128A mutation in iC++ produced a bi-stable aACR called SwiChR++ whose closing kinetics  
164 can be accelerated by red light, making it switchable between open and closed conformation  
165 with short light pulses<sup>5</sup> (Figure 2D-G). Due to the decelerated photocycle aACRs accumulate  
166 the open state, thereby increasing the light sensitivity by several orders of magnitude (Figure  
167 2B, C). Similar to SwiChR++ (here termed iC++<sup>CA</sup> for consistency), where we measured a  
168 3333-fold slower closing time constant than iC++, our new C128A variants of iChloC, Phobos  
169 and Aurora showed 19-fold, 24559-fold, and 1604-fold reductions in their *off*-kinetics,  
170 respectively (Figure 2A,F). Light sensitivity and closing time constant were linearly related  
171 except for iChloC, which had a slightly elevated light sensitivity compared to its closing time  
172 constant (Figure S4B). Aurora ( $EC_{50} = 0.037 \pm 0.003$  mW/mm<sup>2</sup>; n = 5) already showed a  
173 higher operational light sensitivity compared to Phobos and iC++ ( $EC_{50} = 0.22 \pm$   
174  $0.06$  mW/mm<sup>2</sup>, n = 5 and  $0.21 \pm 0.01$  mW/mm<sup>2</sup>, n = 6) due to slower off kinetics (Figure 2A-  
175 C, F). Furthermore, Aurora and Aurora<sup>CA</sup> displayed inactivation at high green light intensities  
176 (Figure 2B) again indicating secondary photochemistry at high light intensities<sup>48</sup>, leading to  
177 additional inactivation by light as already seen in the action spectra (Figure 1C). Orange light  
178 (590 to 600 nm) could be used to excite Aurora at the second peak (Figure 1C). However,  
179 light sensitivity was 14 fold lower compared to 530 nm, but only 2-3 fold lower compared to  
180 Phobos or iC++. Upon activation with 490 nm light iC++<sup>CA</sup> partially inactivated already at  
181 medium light intensities, but blue-shifting the activation wavelength abolished partial  
182 inactivation (Figure 2B, S4A). The *off*-kinetics of step-function aACRs could be accelerated  
183 by light in a wavelength and intensity-dependent manner as reported for other step-function  
184 ChR variants<sup>5,18,19,49</sup>. To determine the inactivation spectra of the C128A aACR variants, we  
185 applied a second light pulse after step-function aACR activation at different wavelengths with  
186 equal photon irradiance (Figure 2D, E). The maximal inactivation of slow-cycling aACRs was  
187 found at 589 nm (n = 6, iC++<sup>CA</sup>/SwiChR++), 603 nm (n = 5, iChloC<sup>CA</sup>), 580 nm (n = 4,  
188 Phobos<sup>CA</sup>) and 626 nm (n = 5, Aurora<sup>CA</sup>) (Figure 2E). Maximal additional activation was  
189 slightly blue-shifted compared to the parental fast cycling aACRs (Figure 2E).

190 Full channel closing of slow-cycling aACR variants could be achieved within seconds or less  
191 with red-shifted light. For Phobos<sup>CA</sup> the closing kinetics were accelerated 3 orders of  
192 magnitude from  $249 \pm 10$  s (n = 4) to  $391 \pm 15$  ms (n = 5) with 590 nm light. Closing of the  
193 iC++ C128A mutation was  $115 \pm 9$  s (n = 7) and could be accelerated 3 orders of magnitude  
194 by 600 nm light to  $150 \pm 15$  ms (n = 7), while the Aurora step-function variant C128A could  
195 be accelerated from  $424 \pm 15$  s to  $916 \pm 43$  ms (n = 5) with 635 nm light. As light-accelerated  
196 closing is a function of light energy, the *off*-kinetics of aACR C128A variants might be further  
197 accelerated with more intense red light<sup>49</sup>. We tested this for iChloC<sup>CA</sup>, where closing could



198 be accelerated from  $128 \pm 9$  s ( $n = 5$ ) to  $346 \pm 20$  ms ( $n = 8$ ) at the maximal intensity  
199 available ( $1.95$  mW/mm<sup>2</sup>) at 610 nm (Figures 2F, S4C, D). With the optimal spectral  
200 wavelengths for excitation and inactivation of step-function aACRs, temporally precise  
201 toggling between open and closed states becomes feasible (Figure 2G).

202 Next, we systematically compared the following additional parameters of Phobos, Aurora,  
203 iC++ and iChloC and their respective C128A variants in HEK cells: photocurrent amplitude,  
204 reversal potential and membrane targeting. First, to determine membrane localization, we  
205 imaged mCherry labelled aACRs, in HEK cells labelled with the membrane marker Vybrant®  
206 DiO by confocal microscopy. All aACRs showed almost exclusive plasma membrane  
207 localization with no or only minor fractions of protein found in intracellular compartments  
208 (Figure 3A). The relative membrane targeting was  $>89\%$  ( $n = 11$  to 21) for all constructs  
209 (Figure 3B). At saturating light intensities (*c.f.* Figure 1D, E) stationary photocurrents of fast-  
210 cycling aACRs ranged between 560 and 720 pA, similar to iC++ and two times larger than  
211 iChloC. Except for iChloC, all slow-cycling aACR variants had 40 to 60 % smaller current  
212 amplitudes compared to their parental constructs (Figure 3C). When activated with 590 nm,  
213 which corresponds to the second activation peak, photocurrents of Aurora and Aurora<sup>CA</sup>  
214 reached 69 % of the green light evoked photocurrent. Finally, we verified chloride selectivity  
215 by measuring the reversal potential ( $E_{rev}$ ) for light-evoked photocurrents.  $E_{rev}$  varied only  
216 minimally between aACRs ( $-65.1 \pm 0.3$  mV,  $n = 5$  to 8) confirming their high chloride  
217 selectivity (Figure 3D).

## 218 **Photocurrents and spike inhibition in hippocampal neurons**

219 After biophysical characterization of Aurora and Phobos including their respective step-  
220 function variants in HEK cells, we next tested their performance in hippocampal neurons.  
221 Citrine-labeled Aurora or Phobos was co-expressed with mCerulean in CA1 pyramidal  
222 neurons of organotypic hippocampal slice cultures. Four to five days after single-cell  
223 electroporation, transfected neurons could be readily identified by their volume marker  
224 mCerulean. CA1 neurons had normal morphology and showed bright, membrane-localized  
225 expression of the Citrine-labeled aACRs, indicating proper membrane insertion of the aACRs  
226 without any obvious effect on neuronal morphology (Figure 4A, E). In whole-cell patch-clamp  
227 experiments we first measured basic biophysical membrane properties of aACR expressing  
228 CA1 neurons in the dark. Overexpression of Phobos or Aurora did not alter membrane  
229 properties or spiking parameters (Supplementary table 1). We next measured the action  
230 spectra of Aurora and Phobos to assess their utility as color-shifted silencing tools in  
231 neurons. CA1 neurons were voltage-clamped at -50 mV, approx. 25 mV above the calculated  
232 Nernst potential for chloride (-75.9 mV). Under these conditions, entry of Cl<sup>-</sup> ions resulted in  
233 outward-directed photocurrents. All experiments were done in the presence of blockers of



234 ionotropic synaptic transmission. Similar to HEK cell experiments, the action spectrum of  
235 Aurora was red-shifted and photocurrents showed a fast inactivating component (Figure 4B,  
236 S5). Illumination with orange-red light produced photocurrents with a slower onset and lack  
237 of the fast component due to reduced absorption cross-section at this wavelength. Tonic  
238 photocurrents still reached  $57 \pm 3\%$  of the maximal stationary current at 595 nm and  
239  $34 \pm 4\%$  at 635 nm. Thus, orange-to-red light is suitable to evoke photocurrents in Aurora-  
240 expressing neurons (Figure 4B, S5). To test the ability of Aurora to block action potentials at  
241 various wavelengths, we held neurons in current clamp and injected a depolarizing current  
242 step of 500 pA for 500 ms, triggering typically 7-15 action potentials (Figure 4C). During  
243 current injection, light pulses (200 ms) ranging from 365 nm to 660 nm at intensities of 0.1, 1  
244 and 10 mW/mm<sup>2</sup> were applied. At the lowest light intensity (0.1 mW/mm<sup>2</sup>), >80 % of action  
245 potentials were blocked between 470 and 525 nm, confirming our HEK cell measurements of  
246 Aurora's action spectrum (Figure 4D). Under high-intensity illumination (10 mW/mm<sup>2</sup>),  
247 however, the spectral range for efficient blocking (>80%) was greatly extended, reaching  
248 from 365 to 595 nm (Figure 4C, D). Thus, if a high-intensity light source is available,  
249 excitation at the edge of Aurora's action spectrum (595 nm, orange) is sufficient to block  
250 action potentials in pyramidal cells.

251 Compared to Aurora, and consistent with our measurements in HEK cells, Phobos showed a  
252 blue-shifted action spectrum, which peaked at 460 nm and was truncated in the long-  
253 wavelength light regime (Figure S5). The peak current was reduced to half-maximum  
254 between 500 and 525 nm (500 nm:  $68.8 \pm 5\%$  and 525 nm:  $41 \pm 5\%$ ). Like Aurora, Phobos  
255 generated a fast inactivating current, which was absent when activated with more red-shifted  
256 light (Figure 4F). As for Aurora, the ability to block action potentials was tested with  
257 illumination at various wavelengths (365 to 635 nm) and intensities (0.1, 1, and 10 mW/mm<sup>2</sup>)  
258 for 200 ms during 500 ms depolarization steps. In agreement with the measured action  
259 spectrum, spikes were efficiently blocked (>90 %) with light up to 525 nm at a saturating  
260 intensity of 10 mW/mm<sup>2</sup>. At 1 mW/mm<sup>2</sup> spike block was only efficiently achieved between  
261 435 to 500 nm. With 0.1 mW/mm<sup>2</sup> action potentials were not efficiently blocked anymore. The  
262 maximal effect (50 %) was reached at 460 nm, the peak of the action spectrum of Phobos  
263 (Figure 4G, H, S5).

264 Next we asked whether the bi-stable variants of Phobos, Aurora and iChloC (C128A) were  
265 suitable to block action potentials for an extended time period after a brief light flash and  
266 whether this block could be reverted with red-shifted illumination, as suggested by the HEK  
267 cell measurements. Like their parental constructs, Phobos<sup>CA</sup>, Aurora<sup>CA</sup> and iChloC<sup>CA</sup> were  
268 fused with Citrine and expressed together with mCerulean. All three step-function aACRs  
269 produced photocurrents upon illumination in voltage clamp. Similar to HEK-cell

270 measurements the net activation spectra were slightly blue-shifted compared to the parental  
271 fast cycling aACRs. Also, inactivation spectra peaked at similar wavelengths (Figures 5A-C,  
272 S6A-D). To assess spike-block performance, we injected repeated, depolarizing current  
273 steps (2 s duration) at an interval of 0.2 Hz in current clamp for one minute, which reliably  
274 evoked action potential firing (Figure 5D, S7). To open the respective step-function aACR  
275 and thereby inhibit action potentials, we applied a 20 ms light flash (Phobos<sup>CA</sup>: 460 nm,  
276 iChloC<sup>CA</sup>: 470 nm, Aurora<sup>CA</sup>: 525 nm) after 5 s. Action potentials were efficiently blocked by  
277 Phobos<sup>CA</sup> and iChloC<sup>CA</sup> in the following 55 s (Figure S7). Also activation of Aurora<sup>CA</sup> resulted  
278 in long-lasting inhibition of action potential firing. However, we noted a slight depolarization of  
279 the resting membrane potential in Aurora<sup>CA</sup> expressing cells during current injection in the  
280 dark (Figure S7A). This might indicate a depolarizing leak conductance in Aurora<sup>CA</sup>  
281 expressing neurons, which is further supported by altered membrane parameters and spike  
282 properties in the dark (Supplementary table 1). Moreover, the membrane markedly  
283 depolarized after light activation, which prevented complete spike block. These limitations  
284 have to be taken into account when considering Aurora<sup>CA</sup> as a silencing tool in neurons.

285 In a subset of experiments, aACRs were closed with a second light flash (1 s, Phobos<sup>CA</sup>:  
286 595 nm, iChloC<sup>CA</sup>: 635 nm, Aurora<sup>CA</sup>: 660 nm) 30 s after the first light flash. Action potentials  
287 immediately returned to the same frequency as before the first light flash, indicating complete  
288 shut-down of the chloride conductance (Figure 5E-G). Since acceleration of channel closing  
289 depends on the light energy absorbed by the open channel, a longer illumination period at  
290 lower light intensities can be used if light power is limited (Figure S6E, F).

### 291 **Light modulation of behavioral responses in *Drosophila***

292 To test if aACRs can functionally inhibit neurons *in vivo*, we used *Drosophila melanogaster*  
293 as a model organism. We tested whether the novel aACRs can functionally inhibit the larval  
294 nociceptive and motor systems. First, we compared the capacity of previously published  
295 enhanced halorhodopsin eNpHR<sup>50</sup> with iChloC<sup>7</sup> and Aurora to inhibit nociceptive class IV da  
296 (C4da) neurons, which mediate larval nocifensive rolling responses to mechanical stimulation  
297<sup>51</sup>. All animals were raised in the presence of all-*trans* retinal (ATR). eNpHR expression in  
298 C4da neurons caused only unspecific defects in nociceptive responses and light-activation of  
299 eNpHR had no detectable further effect (Figure 6A). In contrast, iChloC activation by blue or  
300 green light significantly reduced mechano-nociceptive responses. Notably, 470 nm but not  
301 525 nm illumination alone increased nociceptive responses in control animals that did not  
302 express light-activated channels, likely due to the innate blue light sensitivity of C4da  
303 neurons<sup>16</sup>. Activation of Aurora with 525 nm light strongly reduced nociceptive rolling,  
304 suggesting efficient silencing of C4da neurons at a wavelength that does not facilitate  
305 nociceptive responses (Figure 6A).

306 We next compared the functionality of the newly generated aACRs in larval locomotion. We  
307 expressed aACRs in larval motor neurons and first analyzed their expression and  
308 localization. Aurora, Phobos and Phobos<sup>CA</sup> were highly expressed in motor neurons and  
309 localized predominantly in the axon and at the neuromuscular junction (NMJ). All three  
310 aACRs co-localized with a cell surface marker suggesting efficient surface delivery (Figure  
311 S8). Importantly, NMJ morphology was not affected by aACR overexpression, indicating high  
312 tolerance in *Drosophila* neurons. We next assessed their efficiency in inhibiting locomotion  
313 upon light stimulation. Both, Phobos and Aurora-expressing animals that were raised in the  
314 presence of ATR slowed down significantly during a 15 s illumination period by  $67.4 \pm 2.6 \%$   
315 ( $p < 0.0001$ ,  $n = 57$  animals, repeated measures one-way ANOVA, followed by Sidak's  
316 multiple comparisons test) and  $66.3 \pm 1.8\%$  ( $p < 0.0001$ ,  $n = 52$  animals, repeated measures  
317 one-way ANOVA, followed by Sidak's multiple comparisons test), respectively. After the light  
318 stimulus, the animals accelerated again, showing normal locomotion (Figure 6B-F). Due to  
319 the strong innate behavioral response to visible light<sup>16</sup>, wild-type control animals also  
320 significantly reduced their velocity upon illumination (470 nm:  $52.3 \pm 4.5 \%$ ,  $p < 0.0001$ ,  $n =$   
321  $35$ ; 525 nm  $39.2 \pm 4.5\%$ ,  $p < 0.0001$ ,  $n = 34$ ; Figure 6F, S9). However, this reduction was  
322 significantly smaller than in animals expressing Aurora or Phobos (Figure 6F & S9 A-C).  
323 Importantly, wild-type animals were not motionless during illumination. They rather displayed  
324 stereotypic head-turns, which signify the innate escape response and therefore reduced  
325 linear locomotion speed<sup>52</sup> (Videos 1&2). In contrast, activation of Phobos or Aurora also  
326 abolished head-turning and therefore efficiently inhibited the motor system (Videos 3&4).

327 Due to the direct impact of continuous illumination on locomotion, we reasoned that the step  
328 function mutations should allow us to uncouple the innate light response from the neuronal  
329 silencing effect. We found that Aurora<sup>CA</sup> expression in larval motor neurons was toxic,  
330 perhaps due to leak currents in the dark. Phobos<sup>CA</sup>, on the other hand, was well tolerated by  
331 larvae, and activation was able to fully inhibit larval locomotion, which was sustained after the  
332 light pulse ( $p < 0.0001$ ,  $n = 44$  animals, repeated measures one-way ANOVA, followed by  
333 Sidak's multiple comparisons test, Figure 6G, H, Video 5). The open-state of Phobos<sup>CA</sup> could  
334 be reverted with illumination at 595 nm resulting in efficient recovery of larval locomotion. In  
335 contrast, wild-type control animals only slowed down during the blue light pulse and  
336 immediately regained full locomotion speed after light shutoff (Figure S9D, E, Video 6).  
337 These results show that step-function aACRs can be used to modulate behavior in a binary  
338 manner.

339 Finally, to confirm that aACRs indeed have an inhibitory silencing effect on the motor system,  
340 we compared the effect of Phobos<sup>CA</sup> activation on larval body length with that of  
341 Channelrhodopsin-2-XXL (ChR2<sup>XXL</sup>)<sup>35</sup>. ChR2<sup>XXL</sup> activation in motor neurons resulted in

342 strong body wall muscle contraction and an effective shrinkage of the detectable larval body  
343 area, consistent with motor neuron activation (Figure 6 I, J). Conversely, Phobos<sup>CA</sup> activation  
344 resulted in body wall muscle relaxation indicated by an increase in the detectable area due to  
345 lack of contracting segments. This data confirms the inhibitory nature of Phobos<sup>CA</sup> action.

346

347 **Discussion:**

348 We extensively explored the possibilities to engineer novel aACRs from 11 different well-  
349 characterized CCRs (Figure S1) by employing two independent strategies based on previous  
350 mutagenesis of *CrChR2*<sup>8</sup> or the C1C2 chimera<sup>6</sup>. The latter strategy aimed at systematically  
351 replacing negative charges in the outer pore of the channel with positive or neutral charges,  
352 without compromising the photocycle or protein stability of C1C2. The second strategy was  
353 based on the exchange of an acidic glutamate for a basic arginine at position 90 (E90R) in  
354 the central gate of *CrChR2*. While both approaches led to increased anion selectivity, in both  
355 cases a significant portion of protons was still conducted by the engineered variants. In a  
356 second round of optimization, this residual proton conductance was eliminated by introducing  
357 additional mutations, yielding the two highly chloride selective aACRs iC++ and iChloC<sup>5,7</sup>.  
358 The successful conversion of two different, yet closely related CCRs (*CrChR2* and C1C2,  
359 figure S10) prompted us to systematically investigate the applicability of the two conversion  
360 strategies to other CCRs. We focused mainly on CCRs with blue-, or red-shifted action  
361 spectra relative to iC++ and iChloC. We also asked if the iC++-strategy was applicable to  
362 *CrChR2* and conversely, if the iChloC-strategy was applicable to C1C2. Interestingly, while  
363 ion selectivity could be inverted in *CrChR2* with both strategies, conversion of C1C2 with the  
364 ChloC approach – albeit successful - yielded low channel expression in HEK cells and  
365 negligible photocurrents (Figure S2). Low expression or improper subcellular targeting was  
366 also observed for various CCRs converted with both strategies. Thus, both mutagenesis  
367 strategies were limited to a small subset of CCRs and not generalizable. The main limitation  
368 often appears to be the deleterious effect of mutagenesis on proper folding and plasma  
369 membrane localization of the channel. For example, both ChloC and iC++ conversion  
370 strategies failed for the three blue-shifted CCRs *TcChR*, *TsChR*, *PsChR2* and the fast CCR  
371 Chronos due to loss of protein expression (except for the ChloC strategy on *TcChR*, which  
372 did not affect protein expression but failed to shift ion selectivity). Similarly, photocurrents of  
373 the mutated red-shifted CCRs *VcChR1*, C1V1b and Chrimson were extremely weak or  
374 absent altogether. However, in this case, despite resulting in poor expression and low  
375 photocurrents, the iC++ approach rendered *VcChR1*, C1V1b completely anion-selective.

376 The only CCR where both strategies yielded full anion selectivity without compromising  
377 photocurrents was *CoChR*, which is closely related to C1C2 and *CrChR2* (Figure S10). While  
378 the ChloC approach alone resulted in an incomplete shift of the ion selectivity, additional  
379 iChloC mutations rendered *CoChR* completely anion-selective. However, as shown earlier,  
380 expression in neurons was cytotoxic, most likely due to leakage of the channel in the dark<sup>7</sup>.  
381 Since the ChloC/iChloC conversion strategy failed in all other CCRs, we assume that the  
382 disruption in the central gate caused by the mutation of glutamate to an arginine destabilized

383 the protein. Alternatively, the hydrogen bonding network between amino acids in the central  
384 gate may be differently arranged in different CCRs.

385 Also the iC++ strategy was too disruptive in most cases and only yielded three new aACRs  
386 without introducing leakiness or compromising photocurrents. Of these three, two have a  
387 similar action spectrum than the original iC++ and only Aurora, which was derived from  
388 ReaChR, displayed an action spectrum that was red-shifted compared to existing aACRs.  
389 We mapped the CCRs which could be converted with both approaches on a phylogenetic  
390 tree. Interestingly, the conversion strategies were only successful in CCRs closely related to  
391 CrChR2 and C1C2 (Figure S10). A blue-shifted aACR could be generated by altering the  
392 action spectrum of an existing aACR. This was achieved by converting the two residues  
393 T159 and G163 of iC++ to G and A, respectively, similar to the blue/shifted CCRs *TcChR*,  
394 *TsChR*, *PsChR2*, yielding Phobos. In summary, we successfully produced both a red-shifted  
395 aACR by applying the iC++ strategy to ReaChR and a blue-shifted ACR by introducing two  
396 point mutations from blue-shifted CCRs in iC++.

397 The photocurrents produced by the natural *GtACR1/2* are higher than those of any other  
398 ACR produced or discovered so far, probably due to their large unitary conductance.  
399 Therefore, nACRs may be favored over aACRs if acute, transient silencing is desired.  
400 However, nACRs may still generate significant photocurrents at the far edges of their  
401 absorption spectra, limiting their combination with other light-dependent applications.  
402 Moreover, step-function variants of nACRs that can be toggled between conducting and non-  
403 conducting states by light with different wavelengths have not been reported. Engineering  
404 true step-function opsins (SFO) <sup>18,19</sup> from nACRs is not straightforward due to the low degree  
405 of homology between nACRs and most CCRs/aACRs <sup>53</sup>. In contrast, the SFO-strategy was  
406 previously applied to iC++ where introduction of the C128A mutation yielded the SFO-aACR  
407 SwiChR++ <sup>5</sup>. In the present study, we demonstrate that Aurora, Phobos and the previously  
408 published iChloC can be turned into SFOs by the C128A mutation, slowing down channel  
409 closing by up to 4 orders of magnitude. All new aACRs harboring the C128A mutation could  
410 be completely closed with light red-shifted by approx. 110 – 170 nm compared to the  
411 activation light.

412 While iChloC<sup>CA</sup> and Phobos<sup>CA</sup> did not alter neuronal properties in the dark, Aurora<sup>CA</sup>  
413 apparently was leaky in neurons, resulting in altered membrane properties in hippocampal  
414 neurons and developmental problems in *Drosophila*. Thus, despite successful transformation  
415 into an SFO-aACR, Aurora<sup>CA</sup> cannot be recommended as an optogenetic tool due its side  
416 effects. No such problems were encountered with the original fast-closing version of Aurora.  
417 If long-wavelength activation is desired, iChloC<sup>CA</sup> may be an alternative. The unexpected  
418 red-shift of iChloC<sup>CA</sup> may be a direct consequence of the C128A and D156N mutations. Both

419 residues are located inside the retinal binding pocket and interact with the retinal Schiff base.  
420 The thiol group of C128 was suggested to directly interact with the retinal molecule<sup>47,54</sup>. The  
421 altered hydrogen bonding network may lower the absorption energy required to switch the  
422 bound retinal from all-*trans* to 13-*cis*.

423 Optogenetic experiments involving behavioral read-out always carry the risk that the  
424 photoactivation light is directly sensed by the animal, potentially leading to wrong conclusions  
425 about the function of the neural circuit in question. Two strategies may be employed to avoid  
426 this experimental problem using SFO-aACRs. First, low-intensity light is integrated over time  
427 by SFO-aACRs, accumulating more and more channels in the open state. Compared to  
428 inhibition through light-driven ion pumps, where only a single ion is moved per absorbed  
429 photon, light-gated channels offer greater efficacy, and SFOs take this principle to the  
430 extreme. However, *Drosophila* larvae are detecting and avoiding even low-intensity light<sup>55,56</sup>.  
431 Interference with innate responses is avoided by uncoupling functional silencing from the  
432 light stimulus. This possibility is provided by the second important advantage of SFO-aACRs,  
433 which allows to temporally separate light activation of the anion channel from the behavioral  
434 read-out. All our new C128A mutants (iChloC<sup>CA</sup>, Phobos<sup>CA</sup> and Aurora<sup>CA</sup>) are suitable to  
435 strongly attenuate action potential firing in neurons for at least 50 s after light shutoff (Figure  
436 S7C, D). This property enabled us to dissociate the silencing effects of the SFO-aACR from  
437 the light stimulus in *Drosophila* larvae. Activation of Phobos<sup>CA</sup> with a brief light pulse stopped  
438 locomotion for an extended time period while wild-type larvae showed only a transient  
439 response (Figure S9D, E). In addition, locomotion could be restored by illumination with red  
440 light which does not affect natural behavior<sup>55</sup>. Thus, we provide proof-of-concept that defined  
441 neuronal populations in intact animals can be switched *off* and back *on* with brief light pulses,  
442 allowing investigation of behavioral effects without continuous illumination.

443

444



445 **Methods:**

446 Molecular Biology and aACR variant design — Expression vectors encoding genes for ChRs  
447 where constructed using conventional PCR and restriction enzyme-based cloning methods  
448 (FastDigest, Thermo Fisher Scientific, Waltham, MA). Briefly, ChR cDNAs were cloned into  
449 p-EGFP-C1 vectors using NheI and AgeI restriction sites. EGFP was replaced by mCherry  
450 using AgeI and XhoI restriction sites except for iChloC variants where a p-EGFP-N1 vector  
451 was used. The QuickChange<sup>II</sup> kit (Agilent Technologies, Santa Clara, CA) was used to  
452 exchange single or multiple amino acids (C128A, T159G and G163A) in ChloC/iChloC based  
453 variants. For the iC++ based approach, ChR variants with the replaced N-terminus of iC++  
454 and all iC++ homologous mutations were constructed *in-silico*, synthesized (GenScript, NJ)  
455 and cloned into p-EGFP-C1 vectors as described above. Amino acid sequences and  
456 mutations can be found in the supplementary material (Figure S1). We deposited the  
457 plasmids encoding for aACRs with the Addgene plasmid repository (#98165: p-mCherry-C1-  
458 iC++, #98166: p-mCherry-C1-Phobos, #98167: p-mCherry-C1-Aurora, #98168: p-mCherry-  
459 C1-iC++\_CA, #98169: p-mCherry-C1-Phobos\_CA, #98170: p-mCherry-C1-Aurora\_CA, #  
460 98171: p-mCherry-N1-iChloC\_CA, #98172: p-mCherry-C1-iChR2++, #98173: p-mCherry-C1-  
461 iCoChR++).

462 HEK293 cell culture — HEK-293 cells (ACC-305, catalogue no. 85120602, Sigma-Aldrich,  
463 Munich, Germany) were cultured at 5 % CO<sub>2</sub> and 37 °C in Dulbecco's minimal essential  
464 medium (DMEM) supplemented with 10 % fetal bovine serum (FBS) and 100 µg/ml  
465 penicillin/streptomycin (all from Biochrom, Berlin, Germany). Cells were routinely tested with  
466 DAPI staining and PCR assay for mycoplasma contamination. For electrical recordings, cells  
467 were seeded onto poly-lysine coated glass coverslips at a concentration of  
468  $0.5 \times 10^5$  cells\*ml<sup>-1</sup> (2 ml total in 35 mm standard cell culture dishes) and supplemented with  
469 a final concentration of 1 µM all-*trans* retinal (Sigma-Aldrich, Munich, Germany). For confocal  
470 imaging cells were seeded with the same protocol in poly-lysine coated 35 mm glass bottom  
471 dishes (MaTek, Ashland, MA). Cells were transfected with aACR-cDNA using Fugene HD  
472 (Roche, Mannheim, Germany) 36 h before measurements.

473 Electrophysiological recordings in HEK293 cells — aACR expressing HEK cells were  
474 patched at low chloride conditions (10 mM intra- and extracellular). In whole-cell  
475 configuration the extracellular buffer was changed to high chloride (150 mM), resulting in a  
476 liquid junction potential of 10.5 mV that was corrected on-line. The buffer composition for the  
477 pipette solution (10 mM Cl<sup>-</sup>) was (in mM): 2 MgCl<sub>2</sub>, 2 CaCl<sub>2</sub>, 1 KCl, 1 CsCl, 10 EGTA,  
478 10 HEPES, 110 Na-Aspartate. The low/high chloride bath solution (10/150 mM Cl<sup>-</sup>) was  
479 composed of (in mM): 2 MgCl<sub>2</sub>, 2 CaCl<sub>2</sub>, 1 KCl, 1 CsCl, 10 HEPES, 0/140 NaCl, 140/0 Na-  
480 Aspartate. All buffers were adjusted with N-methyl-D-glucamine to pH 7.2. The final

481 osmolarity was adjusted to 320 mOsm for extracellular solutions and 290 mOsm for  
482 intracellular solutions. External buffer solutions were exchanged by perfusion of at least  
483 2.5 ml of the respective buffer into the custom made recording chamber (volume ~500  $\mu$ l)  
484 while the bath level was kept constant with a ringer bath handler (MCPHU, Lorenz  
485 Messgerätebau, Katlenburg-Lindau, Germany). Patch pipettes were pulled using a P1000  
486 micropipette puller (Sutter Instruments, Novato, CA), and fire-polished. Pipette resistance  
487 was 1.5 to 2.5 M $\Omega$ . A 140 mM NaCl agar bridge served as reference (bath) electrode. In  
488 whole-cell recordings membrane resistance was >500 M $\Omega$  (typically >1 G $\Omega$ ) and access  
489 resistance was below 10 M $\Omega$ . All experiments were carried out at 25 °C. Signals were  
490 amplified (AxoPatch200B), digitized (DigiData1400) and acquired using Clampex 10.4  
491 Software (all from Molecular Devices, Sunnyvale, CA). Holding potentials were varied  
492 between -80 and +40 mV as indicated. A detailed protocol can be found in Grimm et. al<sup>24</sup>.

493 A Polychrome V light source (TILL Photonics, Planegg, Germany) was used in most HEK-  
494 cell experiments. The half band width was set to  $\pm$ 7 nm for all measurements. Actinic light  
495 was coupled into an Axiovert 100 microscope (Carl Zeiss, Jena, Germany) and delivered to  
496 the sample using a 90/10 beamsplitter (Chroma, Bellows Falls, VT). Light exposure was  
497 controlled with a programmable shutter system (VS25 and VCM-D1, Vincent Associates,  
498 Rochester, NY). Intensities were measured in the sample plane with a calibrated optometer  
499 (P9710, Gigahertz Optik, Türkenfeld, Germany). Light intensities were calculated for the  
500 illuminated field of the W Plan-Apochromat 40x/1.0 DIC objective (0.066 mm<sup>2</sup>, Carl Zeiss).

501 To record action spectra, a motorized neutral density filter wheel (NDF) (Newport, Irvine, CA)  
502 was inserted into the light path between the Polychrome V and the microscope to obtain the  
503 same photon irradiance for all wavelengths (390 to 670 nm; 10 or 20 nm steps). Custom  
504 software written in LabVIEW (National Instruments, Austin, TX) was used for control and  
505 synchronization with electrophysiological experiments. Light was applied for 10 ms at 0 mV  
506 holding potential. Minimal deviations in photon irradiance were corrected by linear  
507 normalization post measurements.

508 To record inactivation spectra of step-function aACRs, a 150 W Xenon lamp  
509 (LOT-QuantumDesign, Darmstad, Germany), filtered with single bandpass filters  
510 (460 $\pm$ 10 nm, 490 $\pm$ 8 nm and 520 $\pm$ 20 nm) was coupled into the light path using a 30/70  
511 beamsplitter (Chroma, Bellows Falls, VT) to activate slow-cycling aACRs. The 10 ms light  
512 exposure was controlled with the same programmable shutter system as used for the  
513 Polychrome V. Next, light of various wavelengths at the same photon irradiance (adjusted as  
514 described above) was applied for 8 s to inactivate (or additionally activate) aACRs, followed  
515 by complete channel closing achieved by application of red light for another 8 s. The holding  
516 potential was kept at 0 mV.

517 For light titration experiments, ND filters (SCHOTT, Mainz, Germany) were used for  
518 attenuation. Activating light was applied for 12 s. The holding potential was kept at 20 mV. In  
519 case of step-function aACRs, channel closing was accelerated with application of red light  
520 between single trials.

521 Analysis of HEK293 cell electrophysiology — Data were analyzed using Clampfit 10.4  
522 (Molecular Devices, Sunnyvale, CA) and Origin 9 (OriginLab, Northampton, MA). Stationary  
523 photocurrents were measured for the last 40 ms of illumination period or for 40 ms, 2 s after  
524 activation of step-function variants. To obtain reversal potentials ( $E_{rev}$ ), photocurrents were  
525 plotted against the respective holding potential. Next,  $E_{rev}$  was calculated from the  
526 intersection of the current-voltage relation with the voltage axis. For action spectra,  
527 photocurrents were normalized to the maximum. To determine inactivation spectra (Figure  
528 2E), mean stationary currents before and after additional activation/inactivation light (1 s after  
529 light was switched off) were averaged over a 200 ms period. The current difference (before-  
530 after) was divided by the current prior to inactivation (Figure 2D) and plotted against the  
531 wavelengths. Additional activation was normalized to maximum, whereas inactivation was  
532 not further normalized. The maximum response wavelength ( $\lambda_{max}$ ) was determined by fitting  
533 single recorded action spectra with a 3-parameter Weibull function. Half maximal effective  
534 light dose values ( $EC_{50}$ ) were determined by fitting single light titration curves by logistic  
535 growth function. Kinetic properties were determined by mono- or double-exponential fits and  
536 apparent closing constants were reported. For representative closing kinetic traces (Figure  
537 2A), signals were binned to 50 points per decade with a custom written Matlab script (The  
538 MathWorks, Natick, MA). All data are given as mean  $\pm$  standard error of the mean (SEM).

539 Epifluorescence and bright-field microscopy — Fluorescence HEK-cell images shown in  
540 figures S2 and S3 were acquired with a triple band ECFP/EYFP/mCherry 69008 filterset  
541 (Chroma, Bellows Falls, VT, USA) and a Wat-221S CCD camera (Watec, Tsuruoka, Japan)  
542 on the same Axiovert 100 microscope (Carl Zeiss) setup used for electrophysiological  
543 recordings (see above). Fluorescence excitation of mCherry was performed using  
544 Polychrome V set to  $590 \pm 15$  nm. Background-subtracted images were calculated with Fiji<sup>25</sup>.

545 Confocal microscopy — Confocal HEK-cell images shown in figure 3 were taken with a  
546 FV1000 confocal laser scanning microscope equipped with an UPLSAPO 60XW objective  
547 (Olympus, Hamburg, Germany). The membrane of cells expressing aACR variants fused to  
548 mCherry was labeled with Vybrant DiO (ThermoFisher Scientific). mCherry was excited with  
549 a 559 nm diode laser and DiO was excited with a 488 nm Argon laser. Mean fluorescence  
550 intensities (per area) of the respective aACR-mCherry fusion construct either in the cell  
551 membrane (identified by DiO) or within the cell were evaluated (mean background  
552 fluorescence was subtracted) for three equatorial slices per cell using a custom Fiji macro

553 and then averaged. The relative membrane targeting values were determined by dividing  
554 mean fluorescence density in the cell membrane by the sum of the fluorescence densities  
555 (membrane and cytosol).

556 Two-photon microscopy – Neurons in organotypic slice cultures were imaged with two-  
557 photon microscopy (980 nm excitation) to characterize dendritic morphology and the  
558 subcellular localization of citrine-labeled aACRs. The custom-built microscope was controlled  
559 by ScanImage software (HHMI Janelia Farm) <sup>26</sup>. Green fluorescence was detected through  
560 the objective (LUMPLFLN 60XW, Olympus, Hamburg, Germany) and the oil-immersion  
561 condenser (1.4 NA) using GaAsP-PMTs (Hamamatsu, Japan).

562 Neuronal recordings in hippocampal slice cultures – All aACR mutants were subcloned into  
563 identical neuron-specific expression vectors (pAAV backbone, human *synapsin* promoter),  
564 followed by the sequence for a citrine fluorescent protein <sup>27</sup>. We deposited the AAV-plasmids  
565 encoding aACRs with the Addgene plasmid repository (#98216: Phobos-Citrine, #98217,  
566 Aurora-Citrine, #98218: Phobos<sup>CA</sup>-Citrine, #98219: Aurora<sup>CA</sup>-Citrine, # 98220: iChloC<sup>CA</sup>-  
567 Citrine). Organotypic slice cultures of rat hippocampus were prepared as described <sup>28</sup> and  
568 transfected by single-cell electroporation <sup>29</sup> after 14 days *in vitro* (DIV). Plasmids were each  
569 diluted to 20 ng/μl in K-gluconate-based solution consisting of (in mM): 135 K-gluconate,  
570 4 MgCl<sub>2</sub>, 4 Na<sub>2</sub>-ATP, 0.4 Na-GTP, 10 Na<sub>2</sub>-phosphocreatine, 3 ascorbate, 0.02 Alexa Fluor  
571 594, and 10 HEPES (pH 7.2). An Axoporation 800A (Molecular Devices) was used to deliver  
572 50 hyperpolarizing pulses (–12 mV, 0.5 ms) at 50 Hz. At DIV 18-20, targeted patch-clamp  
573 recordings of transfected neurons were performed under visual guidance using a BX-51WI  
574 microscope (Olympus), a Multiclamp 700B amplifier (Molecular Devices), and Ephys  
575 software (HHMI Janelia Farm) <sup>30</sup>. Patch pipettes with a tip resistance of 3-4 MΩ were filled  
576 with (in mM): 135 K-gluconate, 4 MgCl<sub>2</sub>, 4 Na<sub>2</sub>-ATP, 0.4 Na-GTP, 10 Na<sub>2</sub>-phosphocreatine,  
577 3 ascorbate, 0.2 EGTA, and 10 HEPES (pH 7.2). Artificial cerebrospinal fluid (ACSF)  
578 consisted of (in mM): 135 NaCl, 2.5 KCl, 2 CaCl<sub>2</sub>, 1 MgCl<sub>2</sub>, 10 Na-HEPES, 12.5 D-glucose,  
579 1.25 NaH<sub>2</sub>PO<sub>4</sub> (pH 7.4). Synaptic currents were blocked with 10 μM CPPene, 10 μM NBQX,  
580 and 10 μM bicuculline or 100 μM picrotoxin (Tocris, Bristol, UK). Measurements were  
581 corrected for a liquid junction potential of -10.6 mV. A 16-channel pE-4000 LED light engine  
582 (CoolLED, Andover, UK) was used for epifluorescence excitation and delivery of light pulses  
583 (ranging from 365 to 660 nm). Light intensity was measured in the object plane with a  
584 1918-R power meter equipped with a calibrated 818-ST2-UV/D detector (Newport, Irvine CA)  
585 and divided by the illuminated field (0.134 mm<sup>2</sup>) of the LUMPLFLN 60XW objective  
586 (Olympus).

587 Behavioral assays in *Drosophila melanogaster* – cDNAs encoding aACR were codon-  
588 optimized for *Drosophila melanogaster*, synthesized (Thermo Fisher Scientific) and cloned

589 into a 20x UAS vector (pJFRC7, Addgene #26220)<sup>31</sup> together with a C-terminal mCerulean3  
590<sup>32</sup> for Aurora, Phobos, and Phobos<sup>CA</sup>, or tdTomato<sup>33</sup> for iChloC. Transgenic lines were  
591 generated in the attP2 locus using phiC31-mediated transgenesis<sup>34</sup>. The following additional  
592 lines were used: *UAS-ChR-XXL*<sup>35</sup>, *UAS-eNpHR3.0-YFP*, *ppk-Gal4*<sup>36</sup> for C4da and  
593 *vglut<sup>ok371</sup>-Gal4*<sup>37</sup> for motor neuron expression of aACRs.

594 Embryos from experimental crosses were collected on grape juice agar plates and supplied  
595 with fresh yeast paste containing 5 mM all-*trans* retinal (ATR) and kept at 25 °C in the dark.  
596 Staged and density controlled 3<sup>rd</sup> instar larvae (96 h ± 3 h after egg laying) were collected  
597 under low red light illumination (>700 nm).

598 For mechano-nociception, animals were placed on a 2 % agar plate and forward-locomoting  
599 larvae were stimulated on mid-abdominal segments (3 - 5) with a 50 mN *von Frey* filament  
600 twice within 2 s. The behavioral response was visually scored under a stereoscope as non-  
601 nociceptive (no response, stop, stop and turn) or nociceptive (bending, rolling). For analysis,  
602 only nocifensive rolling behavior (full 360° turn along the body axis) was compared. For  
603 simultaneous aACR activation, ATR-fed staged and density-controlled 3<sup>rd</sup> instar larvae  
604 (96±3 h after egg laying (AEL)) were exposed to 470 nm (0.2 mW/mm<sup>2</sup>) or 525 nm  
605 (0.57 mW/mm<sup>2</sup>) light from a mercury vapor short arc light source under a stereoscope  
606 (Olympus SZX16 with X-Cite 120Q illumination system, Excelitas Technologies, Waltham,  
607 MA). Each genotype was tested multiple times on different days and data from all trials was  
608 combined. Statistical significance was calculated using a chi<sup>2</sup> test.

609 Larval locomotion analysis was performed using a frustrated total internal reflection (FTIR)  
610 based tracking system (FIM, University of Münster)<sup>38</sup>. Five freely moving larvae per trial  
611 were placed on a 1 % agar plate and video-captured with a CMOS camera (ac2040-25gm,  
612 Basler, Ahrensburg, Germany). During free locomotion, aACRs were activated by  
613 illumination with 525 nm light from a RGB-BL-S-Q-1R LED backlight (Phlox, Aix-en-  
614 Provence, France) or 460, 470 and 595 nm light from a pE-4000 (CoolLED) coupled to a light  
615 guide with custom collimator lenses. Animal locomotion was tracked with 10 frames/s for up  
616 to 90 s and then analyzed using FIMtracking software (FIM, University of Münster). Each  
617 genotype was tested multiple times on different days and data from all trials were combined.  
618 For analysis, only animals displaying continuous locomotion before the light stimulus were  
619 kept. Locomotion velocity was analyzed over time. For comparison, velocities were averaged  
620 over a 5 s interval, each before, during and after light mediated activation of aACRs.

621 To compare the effect on body wall muscle contraction of inhibitory aACRs with excitatory  
622 ChR2<sup>XXL</sup><sup>35</sup> we analyzed the larval area change before and after light activation using  
623 FIMtracking software (FIM, University of Münster). Animal size was averaged over a 5 s



624 interval before and after light activation for analysis. Statistical significance was calculated by  
625 ANOVA followed by a Sidak's multiple comparisons test for repeated measurements or a  
626 (non-parametric) Kruskal-Wallis test followed by a Dunn's multiple comparisons test for  
627 comparisons between groups.

628 Immunohistochemistry of larval neuromuscular junctions (NMJs). – 3rd instar larval fillets  
629 were dissected in PBS and pinned down on Sylgard plates (Dow Corning, Midland, MI) with  
630 minuten pins (Fine Science Tools, Heidelberg, Germany). Animals were cut open dorsally  
631 and internal organs were removed while leaving the nervous system intact. Fillet  
632 preparations were fixed in 4 % formaldehyde/PBS for 20 min, blocked in PBS/0.3 % Triton  
633 X-100 containing 5 % normal donkey serum (Jackson ImmunoResearch Laboratories, West  
634 Grove, PA). Larvae expressing Aurora–Cerulean or Phobos<sup>CA</sup>–Cerulean in motor neurons  
635 (*ok371-Gal4*) were immunostained using a rabbit anti-GFP antibody (1:500, cat. no. A-  
636 11122, 1DB-ID: 1DB-001-0000868907, ThermoFisher Scientific). Secondary donkey anti-  
637 rabbit-DyLight488 and anti-HRP-Cy3 antibodies were used at 1:300 dilution (cat. no.123-  
638 165-021, DB-ID:1DB-001-0000865678, Jackson ImmunoResearch). NMJs at muscle 6/7  
639 were visualized by confocal microscopy with a 20x/NA 0.8 air objective (Zeiss LSM700, Carl  
640 Zeiss).

641 Statistics – All statistical analyses were performed using GraphPad Prism 6.0 or Origin 10.5.  
642 Data were tested for normal distribution by D'Agostino & Pearson omnibus normality test.  
643 Normally distributed data were tested for significant differences (\*P<0.05, \*\*P<0.01,  
644 \*\*\*P<0.001 and \*\*\*\*P<0.0001) with one-way repeated-measures analysis of variance  
645 followed by Tukey's, Dunnett's or Sidak's multiple comparisons test. Not normally distributed  
646 data were tested with the nonparametric Kruskal-Wallis test followed by Dunn's multiple  
647 comparisons test. Data are presented as mean ± standard error of the mean (SEM). No  
648 statistical measures were used to estimate sample size since effect size was unknown.  
649 Given n numbers represent biological replicates (i.e. HEK-cells, neurons, *Drosophila* larvae).  
650 For HEK-cell measurements and hippocampal neuronal recordings investigators were not  
651 blinded to the group allocation during the experiments. Nociceptive *Drosophila* experiments  
652 were blinded. Data analysis was done by expert investigators who did not carry out the  
653 experiments. In addition, unsupervised analysis software was used if possible to preclude  
654 investigator biases. All experiments were done with interleaved controls and treatment  
655 groups were mixed, where possible.

656 Data availability – The authors declare that all data and code supporting the findings of this  
657 study are included in the manuscript and its Supplementary Information or are available from  
658 the corresponding authors on request. The plasmids used in this study are deposited with the  
659 Addgene plasmid repository.

## 660 References

- 661 1 Govorunova, E. G., Sineshchekov, O. A. & Spudich, J. L. *Proteomonas sulcata*  
662 ACR1: A Fast Anion Channelrhodopsin. *Photochemistry and photobiology*,  
663 doi:10.1111/php.12558 (2015).
- 664 2 Govorunova, E. G., Sineshchekov, O. A., Janz, R., Liu, X. & Spudich, J. L.  
665 NEUROSCIENCE. Natural light-gated anion channels: A family of microbial  
666 rhodopsins for advanced optogenetics. *Science* **349**, 647-650,  
667 doi:10.1126/science.aaa7484 (2015).
- 668 3 Wietek, J., Broser, M., Krause, B. S. & Hegemann, P. Identification of a Natural  
669 Green Light Absorbing Chloride Conducting Channelrhodopsin from *Proteomonas*  
670 *sulcata*. *J Biol Chem* **291**, 4121-4127, doi:10.1074/jbc.M115.699637 (2016).
- 671 4 Govorunova, E. G. *et al.* The Expanding Family of Natural Anion Channelrhodopsins  
672 Reveals Large Variations in Kinetics, Conductance, and Spectral Sensitivity.  
673 *Scientific reports* **7**, 43358, doi:10.1038/srep43358 (2017).
- 674 5 Berndt, A. *et al.* Structural foundations of optogenetics: Determinants of  
675 channelrhodopsin ion selectivity. *Proc Natl Acad Sci U S A* **113**, 822-829,  
676 doi:10.1073/pnas.1523341113 (2016).
- 677 6 Berndt, A., Lee, S. Y., Ramakrishnan, C. & Deisseroth, K. Structure-guided  
678 transformation of channelrhodopsin into a light-activated chloride channel. *Science*  
679 **344**, 420-424, doi:10.1126/science.1252367 (2014).
- 680 7 Wietek, J. *et al.* An improved chloride-conducting channelrhodopsin for light-induced  
681 inhibition of neuronal activity in vivo. *Scientific reports* **5**, 14807,  
682 doi:10.1038/srep14807 (2015).
- 683 8 Wietek, J. *et al.* Conversion of channelrhodopsin into a light-gated chloride channel.  
684 *Science* **344**, 409-412, doi:10.1126/science.1249375 (2014).
- 685 9 Takahashi, N., Oertner, T. G., Hegemann, P. & Larkum, M. E. Active cortical  
686 dendrites modulate perception. *Science* **354**, 1587-1590,  
687 doi:10.1126/science.aah6066 (2016).
- 688 10 Kim, H., Ahrlund-Richter, S., Wang, X., Deisseroth, K. & Carlen, M. Prefrontal  
689 Parvalbumin Neurons in Control of Attention. *Cell* **164**, 208-218,  
690 doi:10.1016/j.cell.2015.11.038 (2016).
- 691 11 Park, S. *et al.* Neuronal Allocation to a Hippocampal Engram.  
692 *Neuropsychopharmacology* **41**, 2987-2993, doi:10.1038/npp.2016.73 (2016).
- 693 12 Chung, S. *et al.* Identification of preoptic sleep neurons using retrograde labelling and  
694 gene profiling. *Nature* **545**, 477-481, doi:10.1038/nature22350 (2017).
- 695 13 Al-Juboori, S. I. *et al.* Light scattering properties vary across different regions of the  
696 adult mouse brain. *PLoS One* **8**, e67626, doi:10.1371/journal.pone.0067626 (2013).
- 697 14 Yona, G., Meitav, N., Kahn, I. & Shoham, S. Realistic Numerical and Analytical  
698 Modeling of Light Scattering in Brain Tissue for Optogenetic Applications(1,2,3).  
699 *eNeuro* **3**, doi:10.1523/ENEURO.0059-15.2015 (2016).
- 700 15 Stujenske, J. M., Spellman, T. & Gordon, J. A. Modeling the Spatiotemporal  
701 Dynamics of Light and Heat Propagation for In Vivo Optogenetics. *Cell reports* **12**,  
702 525-534, doi:10.1016/j.celrep.2015.06.036 (2015).



- 703 16 Xiang, Y. *et al.* Light-avoidance-mediating photoreceptors tile the *Drosophila* larval  
704 body wall. *Nature* **468**, 921-926, doi:10.1038/nature09576 (2010).
- 705 17 Ward, A., Liu, J., Feng, Z. & Xu, X. Z. Light-sensitive neurons and channels mediate  
706 phototaxis in *C. elegans*. *Nat Neurosci* **11**, 916-922, doi:10.1038/nn.2155 (2008).
- 707 18 Berndt, A., Yizhar, O., Gunaydin, L. A., Hegemann, P. & Deisseroth, K. Bi-stable  
708 neural state switches. *Nat Neurosci* **12**, 229-234, doi:10.1038/nn.2247 (2009).
- 709 19 Yizhar, O. *et al.* Neocortical excitation/inhibition balance in information processing  
710 and social dysfunction. *Nature* **477**, 171-178, doi:10.1038/nature10360 (2011).
- 711 20 Han, X. & Boyden, E. S. Multiple-color optical activation, silencing, and  
712 desynchronization of neural activity, with single-spike temporal resolution. *PLoS One*  
713 **2**, e299, doi:10.1371/journal.pone.0000299 (2007).
- 714 21 Zhang, F., Aravanis, A. M., Adamantidis, A., de Lecea, L. & Deisseroth, K. Circuit-  
715 breakers: optical technologies for probing neural signals and systems. *Nat Rev*  
716 *Neurosci* **8**, 577-581, doi:10.1038/nrn2192 (2007).
- 717 22 Chow, B. Y. *et al.* High-performance genetically targetable optical neural silencing by  
718 light-driven proton pumps. *Nature* **463**, 98-102, doi:10.1038/nature08652 (2010).
- 719 23 Jan, Y. N. & Jan, L. Y. Branching out: mechanisms of dendritic arborization. *Nat Rev*  
720 *Neurosci* **11**, 316-328, doi:10.1038/nrn2836 (2010).
- 721 24 Grimm, C., Vierock, J., Hegemann, P. & Wietek, J. Whole-cell Patch-clamp  
722 Recordings for Electrophysiological Determination of Ion Selectivity in  
723 Channelrhodopsins. *J Vis Exp*, e55497, doi:10.3791/55497 (2017).
- 724 25 Schindelin, J. *et al.* Fiji: an open-source platform for biological-image analysis. *Nat*  
725 *Methods* **9**, 676-682, doi:10.1038/nmeth.2019 (2012).
- 726 26 Pologruto, T. A., Sabatini, B. L. & Svoboda, K. ScanImage: flexible software for  
727 operating laser scanning microscopes. *Biomed Eng Online* **2**, 13, doi:10.1186/1475-  
728 925X-2-13 (2003).
- 729 27 Griesbeck, O., Baird, G. S., Campbell, R. E., Zacharias, D. A. & Tsien, R. Y.  
730 Reducing the environmental sensitivity of yellow fluorescent protein. Mechanism and  
731 applications. *The Journal of biological chemistry* **276**, 29188-29194,  
732 doi:10.1074/jbc.M102815200 (2001).
- 733 28 Gee, C. E., Ohmert, I., Wiegert, J. S. & Oertner, T. G. Preparation of Slice Cultures  
734 from Rodent Hippocampus. *Cold Spring Harbor protocols* **2017**, pdb prot094888,  
735 doi:10.1101/pdb.prot094888 (2017).
- 736 29 Wiegert, J. S., Gee, C. E. & Oertner, T. G. Single-Cell Electroporation of Neurons.  
737 *Cold Spring Harbor protocols* **2017**, pdb prot094904, doi:10.1101/pdb.prot094904  
738 (2017).
- 739 30 Suter, B. A. *et al.* Ephus: multipurpose data acquisition software for neuroscience  
740 experiments. *Front Neural Circuits* **4**, 100, doi:10.3389/fncir.2010.00100 (2010).
- 741 31 Pfeiffer, B. D. *et al.* Refinement of tools for targeted gene expression in *Drosophila*.  
742 *Genetics* **186**, 735-755, doi:10.1534/genetics.110.119917 (2010).
- 743 32 Markwardt, M. L. *et al.* An improved cerulean fluorescent protein with enhanced  
744 brightness and reduced reversible photoswitching. *PLoS One* **6**, e17896,  
745 doi:10.1371/journal.pone.0017896 (2011).

- 746 33 Shaner, N. C. *et al.* Improving the photostability of bright monomeric orange and red  
747 fluorescent proteins. *Nat Methods* **5**, 545-551, doi:10.1038/nmeth.1209 (2008).
- 748 34 Groth, A. C., Fish, M., Nusse, R. & Calos, M. P. Construction of transgenic *Drosophila*  
749 by using the site-specific integrase from phage phiC31. *Genetics* **166**, 1775-1782  
750 (2004).
- 751 35 Dawydow, A. *et al.* Channelrhodopsin-2-XXL, a powerful optogenetic tool for low-light  
752 applications. *Proceedings of the National Academy of Sciences of the United States*  
753 *of America* **111**, 13972-13977, doi:10.1073/pnas.1408269111 (2014).
- 754 36 Han, C., Jan, L. Y. & Jan, Y. N. Enhancer-driven membrane markers for analysis of  
755 nonautonomous mechanisms reveal neuron-glia interactions in *Drosophila*.  
756 *Proceedings of the National Academy of Sciences of the United States of America*  
757 **108**, 9673-9678, doi:10.1073/pnas.1106386108 (2011).
- 758 37 Mahr, A. & Aberle, H. The expression pattern of the *Drosophila* vesicular glutamate  
759 transporter: a marker protein for motoneurons and glutamatergic centers in the brain.  
760 *Gene Expr Patterns* **6**, 299-309, doi:10.1016/j.modgep.2005.07.006 (2006).
- 761 38 Risse, B. *et al.* FIM, a novel FTIR-based imaging method for high throughput  
762 locomotion analysis. *PLoS One* **8**, e53963, doi:10.1371/journal.pone.0053963 (2013).
- 763 39 Klapoetke, N. C. *et al.* Independent optical excitation of distinct neural populations.  
764 *Nat Methods* **11**, 338-346, doi:10.1038/nmeth.2836 (2014).
- 765 40 Govorunova, E. G., Sineshchekov, O. A., Li, H., Janz, R. & Spudich, J. L.  
766 Characterization of a highly efficient blue-shifted channelrhodopsin from the marine  
767 alga *Platymonas subcordiformis*. *The Journal of biological chemistry* **288**, 29911-  
768 29922, doi:10.1074/jbc.M113.505495 (2013).
- 769 41 Zhang, F. *et al.* Red-shifted optogenetic excitation: a tool for fast neural control  
770 derived from *Volvox carteri*. *Nat Neurosci* **11**, 631-633, doi:10.1038/nn.2120 (2008).
- 771 42 Wang, H. *et al.* Molecular determinants differentiating photocurrent properties of two  
772 channelrhodopsins from *Chlamydomonas*. *The Journal of biological chemistry* **284**,  
773 5685-5696, doi:10.1074/jbc.M807632200 (2009).
- 774 43 Tsunoda, S. P. & Hegemann, P. Glu 87 of channelrhodopsin-1 causes pH-dependent  
775 color tuning and fast photocurrent inactivation. *Photochemistry and photobiology* **85**,  
776 564-569, doi:10.1111/j.1751-1097.2008.00519.x (2009).
- 777 44 Prigge, M. *et al.* Color-tuned channelrhodopsins for multiwavelength optogenetics.  
778 *The Journal of biological chemistry* **287**, 31804-31812, doi:10.1074/jbc.M112.391185  
779 (2012).
- 780 45 Yizhar, O., Fenno, L. E., Davidson, T. J., Mogri, M. & Deisseroth, K. Optogenetics in  
781 neural systems. *Neuron* **71**, 9-34, doi:10.1016/j.neuron.2011.06.004 (2011).
- 782 46 Lin, J. Y., Knutsen, P. M., Muller, A., Kleinfeld, D. & Tsien, R. Y. ReaChR: a red-  
783 shifted variant of channelrhodopsin enables deep transcranial optogenetic excitation.  
784 *Nat Neurosci* **16**, 1499-1508, doi:10.1038/nn.3502 (2013).
- 785 47 Kato, H. E. *et al.* Structural basis for Na(+) transport mechanism by a light-driven  
786 Na(+) pump. *Nature* **521**, 48-53, doi:10.1038/nature14322 (2015).
- 787 48 Krause, B. S. *et al.* Complex Photochemistry within the Green-Absorbing  
788 Channelrhodopsin ReaChR. *Biophys J* **112**, 1166-1175,  
789 doi:10.1016/j.bpj.2017.02.001 (2017).

- 790 49 Hososhima, S., Sakai, S., Ishizuka, T. & Yawo, H. Kinetic evaluation of  
791 photosensitivity in bi-stable variants of chimeric channelrhodopsins. *PLoS One* **10**,  
792 e0119558, doi:10.1371/journal.pone.0119558 (2015).
- 793 50 Gradinaru, V., Thompson, K. R. & Deisseroth, K. eNpHR: a *Natronomonas*  
794 halorhodopsin enhanced for optogenetic applications. *Brain Cell Biol* **36**, 129-139,  
795 doi:10.1007/s11068-008-9027-6 (2008).
- 796 51 Hwang, R. Y. *et al.* Nociceptive neurons protect *Drosophila* larvae from parasitoid  
797 wasps. *Curr Biol* **17**, 2105-2116, doi:10.1016/j.cub.2007.11.029 (2007).
- 798 52 Kane, E. A. *et al.* Sensorimotor structure of *Drosophila* larva phototaxis. *Proceedings*  
799 *of the National Academy of Sciences of the United States of America* **110**, E3868-  
800 3877, doi:10.1073/pnas.1215295110 (2013).
- 801 53 Sineshchekov, O. A., Govorunova, E. G., Li, H. & Spudich, J. L. Gating mechanisms  
802 of a natural anion channelrhodopsin. *Proceedings of the National Academy of*  
803 *Sciences of the United States of America* **112**, 14236-14241,  
804 doi:10.1073/pnas.1513602112 (2015).
- 805 54 Guo, Y. *et al.* Active site structure and absorption spectrum of channelrhodopsin-2  
806 wild-type and C128T mutant. *Chemical Science* **7**, 3879-3891,  
807 doi:10.1039/c6sc00468g (2016).
- 808 55 Keene, A. C. & Sprecher, S. G. Seeing the light: photobehavior in fruit fly larvae.  
809 *Trends Neurosci* **35**, 104-110, doi:10.1016/j.tins.2011.11.003 (2012).
- 810 56 Busto, M., Iyengar, B. & Campos, A. R. Genetic dissection of behavior: modulation of  
811 locomotion by light in the *Drosophila melanogaster* larva requires genetically distinct  
812 visual system functions. *J Neurosci* **19**, 3337-3344 (1999).
- 813
- 814

815 **Acknowledgements:**

816 We thank Edward Boyden (*TcChR*, *TsChR*, *CoChR*, Chronos and Chrimson), Johannes  
817 Vierock (C1C2) and the late Roger Y. Tsien (ReaChR) for providing plasmids encoding for  
818 CCRs. We further thank Ivan Haralampiev, Thomas Korte and Andreas Hermann for help  
819 with confocal microscopy, Iris Ohmert and Sabine Graf for hippocampal slice cultures,  
820 Benjamin S. Krause for discussions and Kathrin Sauter, Maila Reh, Altina Klein and  
821 Tharsana Tharmalingam for technical assistance.

822 This work was funded by grants from the European Research Council (ERC-2016-StG  
823 714762 to J.S.W), the German Research Foundation (SPP 1926 to P.S. & J.S.W.; FOR 2419  
824 to J.S.W. and T.G.O., SFB1078 B2, FOR 1279, SPP 1665 to P.H. and T.G.O.). P.H. is Hertie  
825 Senior Professor for Neuroscience and supported by the Hertie Foundation.

826

827 **Author contributions:**

828 J.W., T.G.O., P.S., P.H. and J.S.W. conceived the study and planned experiments, J.W.,  
829 S.R.R., J.T., F.T., C.G. and J.S.W. performed the experiments, J.W., S.R.R., J.T., F.T., C.G.,  
830 P.S. and J.S.W. analyzed the data. J.W. and J.S.W. wrote the manuscript with contributions  
831 from all authors.

832

833 **Competing interests:**

834 The authors declare no competing financial interests.

835

836 **Figure legends:**

837 **Figure 1: Construct design and screening result for aACRs.** (A) Conversion strategies  
838 yielding the aACRs ChloC, iChloC (left) and iC++ (right). The transmembrane helices of  
839 CrChR2 (ChR2) and CrChR1 (ChR1) are shown in green and purple, respectively. The  
840 positions of the outer access channel, central gate (including retinal binding pocket) and  
841 inner gate are indicated by gray horizontal stripes. Mutations are displayed as circles at the  
842 relative position within the respective helix. ChloC has the mutations E90R and T159C,  
843 whereas in iChloC E83Q and E101S were additionally introduced. The D156N mutation from  
844 slowChloC is also present in iChloC (left). iC++ exhibits 10 mutations and a modified N-  
845 terminal sequence (right). (B) Summary of the mutation transfer approach. Most ChR-  
846 variants harboring ChloC- or IC++-mutations showed no photocurrents. In addition, of  
847 constructs, which produced a photocurrent, the majority had no or only partial Cl<sup>-</sup> conductivity  
848 ( $\sigma(\text{Cl}^-)$ ). For details and ChR abbreviations, please see main text. (C) Action spectra of  
849 aACRs. Peak wavelengths (indicated above) were obtained from fitting with a 3-parameter  
850 Weibull distribution. In addition to typical low intensity action spectra (solid lines) obtained  
851 with 10 ms pulsed activation, a spectrum with continuous illumination of 500 ms and tenfold  
852 increased photon irradiance was recorded for Aurora (dotted line). Data points show  
853 mean $\pm$ SEM (n = 6) Phobos, 9 iC++, 7 Aurora, 6 Aurora with tenfold photon irradiance, 6  
854 iChloC). (D and E) Typical photocurrent traces at high extracellular [Cl<sup>-</sup>] of the newly  
855 developed aACRs Phobos (D, right) and Aurora (E) compared to the established aACR iC++  
856 (D, left). The holding potential was increased from -80 mV (bottom) to +40 mV (top trace) in  
857 20 mV steps. Duration of light application at respective wavelengths is indicated by colored  
858 bars above the traces.

859 **Figure 2: Kinetics, light sensitivity and control of aACRs.** (A) Normalized photocurrent  
860 traces after light shutoff are displayed for fast cycling aACRs and their respective C128A  
861 step-function variants logarithmically binned to 50 data points per decade. (B) Light titration  
862 of aACRs and aACR C128A variants. Stationary photocurrents are normalized to the  
863 maximum (n = 5 Phobos, 4 Phobos<sup>CA</sup>, 7 iC++, 6 iC++<sup>CA</sup>, 5 Aurora, 5 Aurora 590 nm, 4  
864 Aurora<sup>CA</sup>, 5 iChloC, 4 iChloC<sup>CA</sup>). (C) Light-activation  $EC_{50}$  values of fast cycling aACRs (WT)  
865 and their C128A variants (CA) obtained from fitted measurements shown in (B). (D) Example  
866 recording demonstrating the strategy to determine wavelength dependent inactivation for  
867 step-function aACRs. After fully opening the channel with a 10 ms light pulse at the peak  
868 activating wavelength, light with different wavelengths at identical photon irradiance was  
869 applied to accelerate channel closing. The aACR was fully closed with high-intensity red-  
870 shifted light after each trial. (E) Inactivation spectra calculated from measurements as shown

871 in (D). Positive values show additional activation, whereas negative values denote  
872 inactivation ( $n = 4$  Phobos<sup>CA</sup>, 6 iC++<sup>CA</sup>, 5 Aurora<sup>CA</sup>, 5 iChloC<sup>CA</sup>). Wavelengths yielding  
873 maximal activation and inactivation are displayed for each aACR C128A above or under the  
874 curves, respectively. (F) Apparent closing kinetic time constants ( $\tau_{off}$ ) of fast cycling aACRs  
875 (WT), their C128A variants (CA) and the accelerated closing by application of red-shifted  
876 light. ( $n = 6$  Phobos, 4 Phobos<sup>CA</sup>, 5 Phobos<sup>CA</sup> accelerated, 8 iC++, 7 iC++<sup>CA</sup>, 7 iC++<sup>CA</sup>  
877 accelerated, 8 Aurora, 5 Aurora<sup>CA</sup>, 5 Aurora<sup>CA</sup> accelerated, 7 iChloC, 5 iChloC<sup>CA</sup>, 8 iChloC<sup>CA</sup>  
878 accelerated). (G) Typical photocurrent traces of the newly developed step-function aACRs  
879 Phobos<sup>CA</sup>, iChloC<sup>CA</sup> and Aurora<sup>CA</sup> compared to the established step-function aACR iC++<sup>CA</sup>  
880 (alias SwiChR++), activated by short 10 ms light pulses. Channel closing was always  
881 facilitated with red-shifted light. Mean values  $\pm$  SEM together with single measurement data  
882 points (dots) are shown in (B, C, E and F).

883 **Figure 3: Membrane targeting, amplitudes and reversal potentials of aACRS.** (A) HEK  
884 cells expressing the established aACRs iC++, iChloC and their C128A variants or the newly  
885 generated aACR Phobos and Aurora and their C128A variants fused to the mCherry were  
886 co-labelled with the membrane dye Vybrant®-DiO (middle row). Upper row: confocal images  
887 of mCherry, lower row: merged images of aACR-mCherry and labelled cell membrane  
888 (equatorial z-slices). Intensity and/or contrast for DiO were adjusted due to different staining  
889 efficiency. (B) Relative membrane targeting of aACRs ( $n = 14$  Phobos, 12 Phobos<sup>CA</sup>, 13  
890 iC++, 13 iC++<sup>CA</sup>, 11 Aurora, 12 Aurora<sup>CA</sup>, 18 iChloC, 21 iChloC<sup>CA</sup>). (C) Absolute stationary  
891 photocurrents of aACRs at indicated conditions ( $n = 6$  Phobos, 5 Phobos<sup>CA</sup>, 6 iC++, 6 iC++<sup>CA</sup>,  
892 5 Aurora, 7 Aurora<sup>CA</sup>, 9 iChloC, 7 iChloC<sup>CA</sup>). (E) Reversal potentials ( $E_{rev}$ ) for all aACRs at  
893 high-extracellular (150 mM) and low-intracellular (10 mM) chloride concentrations ( $n = 5$   
894 Phobos, 5 Phobos<sup>CA</sup>, 6 iC++, 5 iC++<sup>CA</sup>, 8 Aurora, 5 Aurora<sup>CA</sup>, 7 iChloC, 6 iChloC<sup>CA</sup>). Bar plots  
895 show mean $\pm$ SEM. Single measurement data points are shown as dots.

896 **Figure 4: Phobos and Aurora in CA1 pyramidal cells in organotypic hippocampal slice**  
897 **culture.** (A) CA1 pyramidal neuron expressing Aurora-Citrine 5 days after electroporation  
898 (stitched maximum intensity projections of two-photon images, fluorescence intensity shown  
899 as inverted gray values). Citrine fluorescence was mainly localized to the plasma membrane  
900 across the entire cell. Inset shows magnified view of the apical dendrite. (B) Representative  
901 photocurrent traces evoked at indicated wavelengths (10 mW/mm<sup>2</sup>). (C) Membrane voltage  
902 traces in response to 500 ms current injections and 200 ms light pulses at indicated  
903 wavelengths (10 mW/mm<sup>2</sup>). Light application was delayed by 144 ms with respect to current  
904 onset. (D) Quantification of action potential inhibition at indicated light intensities and  
905 wavelengths ( $n = 6$  to 7). Lines are interpolations of data points and shaded areas represent  
906 SEM. (E to H) same as (A to D) for Phobos-Citrine expressing neurons (H,  $n = 4$  to 7).



907 **Figure 5: iChloC<sup>CA</sup>, Phobos<sup>CA</sup> and Aurora<sup>CA</sup> in CA1 pyramidal cells in organotypic**  
908 **hippocampal slice cultures. (A)** Representative photocurrent traces of a Phobos<sup>CA</sup>  
909 expressing CA1 cell evoked with different activation wavelengths and shutoff with 595 nm  
910 light. **(B)** Photocurrent traces in the same cell evoked with 460 nm light and shutoff with  
911 indicated wavelengths (10 mW/mm<sup>2</sup>). **(C)** Activation spectra (dashed lines) and inactivation  
912 spectra (solid lines) of Phobos<sup>CA</sup>, iChloC<sup>CA</sup> and Aurora<sup>CA</sup> in CA1 pyramidal neurons. Lines  
913 are interpolations of data points and shaded areas represent SEM (n = 2 to 9). **(D)**  
914 Membrane voltage trace shows reversible suppression of depolarization-induced spiking by  
915 photoswitching Phobos<sup>CA</sup> between open and closed state. **(E to G)** Quantification of the spike  
916 rate during current injection at indicated time intervals before opening light pulse, after  
917 opening light pulse and after closing light pulse in CA1 neurons expressing iChloC<sup>CA</sup>-Citrine  
918 (E, n = 12 neurons in 12 slice cultures), Phobos<sup>CA</sup>-Citrine (F, n = 7) or Aurora<sup>CA</sup>-Citrine (G, n  
919 = 5). Gray symbols indicate individual experiments. Mean values are shown as rectangular  
920 symbols with SEM. \*\*\*\*: p < 0.0001, repeated measures one-way ANOVA followed by  
921 Tukey's multiple comparisons test.

922 **Figure 6: aACRs in *Drosophila* larval nociception and locomotion. (A)** Mechano-  
923 nociceptive responses (rolling) of 3rd instar larvae after 50 mN stimulation with a *von Frey*  
924 filament, with and without light activation of C4da neuron (*ppk-Gal4*) expressed  
925 Halorhodopsin (2x eNpHR), iChloC or Aurora. Low light (gray), 470nm (blue) and 525nm  
926 (green) conditions are shown as indicated by color (n as indicated, \*\*\*: p < 0.001, chi<sup>2</sup> test).  
927 **(B)** Representative traces of freely locomoting larvae expressing Aurora in motor neurons  
928 (*ok371-Gal4*). Arrows indicate onset (green, 525 nm, 21 μW/mm<sup>2</sup>) and offset (gray) of light  
929 activation. Relative velocity is color intensity coded in red. **(C)** Average larval velocity over  
930 time is plotted for Phobos or Aurora expressing animals with activation using a 460 nm or  
931 525 nm light pulse for 15 s, respectively (n = 49 animals for Phobos, n = 52 animals for  
932 Aurora, mean ± SEM). **(D and E)** Averaged velocity before (5 - 10 s), during (20 - 25 s) and  
933 after (35 - 40 s) light induced activation of (D) Phobos or (E) Aurora (n = 49 animals for  
934 Phobos, n = 52 animals for Aurora, mean ± SEM). **(F)** Relative velocity reduction during light  
935 for Phobos, Aurora and control animals using 460 nm or 525 nm light, respectively (mean ±  
936 SEM, \*\*\*: p < 0.001, \*\*\*\*: p < 0.0001, non-parametric Kruskal-Wallis test followed by Dunn's  
937 multiple comparisons test). **(G)** Inhibition of larval locomotion by Phobos<sup>CA</sup> expression in  
938 motor neurons (*ok371-Gal4*). Average larval velocity over time showing inhibition of  
939 locomotion after light induced Phobos<sup>CA</sup> activation (460 nm, 80 μW/mm<sup>2</sup>) and recovery by  
940 channel closing with 595 nm light (1.7 mW/mm<sup>2</sup>). All animals on an agar plate were  
941 sequentially illuminated (5 s each) for channel closing during the time period indicated by the  
942 dashed box. **(H)** Average velocities before (5 - 10 s) light induced activation of Phobos<sup>CA</sup>,  
943 during inhibition (20 - 25 s) and after channel closing with red-shifted 595 nm light (>60 s) (n



944 = 54 animals, mean  $\pm$  SEM). (I) Comparison of relative larval body size change after ChR2<sup>XXL</sup>  
945 mediated activation of motor neurons and Phobos<sup>CA</sup> mediated inhibition. Normalized larval  
946 body area is plotted over time with indicated light activation of Phobos<sup>CA</sup> or ChR2<sup>XXL</sup>. (J)  
947 Quantitative comparison of the relative area change before and after light mediated  
948 activation of ChR2<sup>XXL</sup> or Phobos<sup>CA</sup> (n = 44 animals for Phobos<sup>CA</sup>, n = 46 animals for ChR2<sup>XXL</sup>,  
949 mean $\pm$ SEM).

950

Figure 1

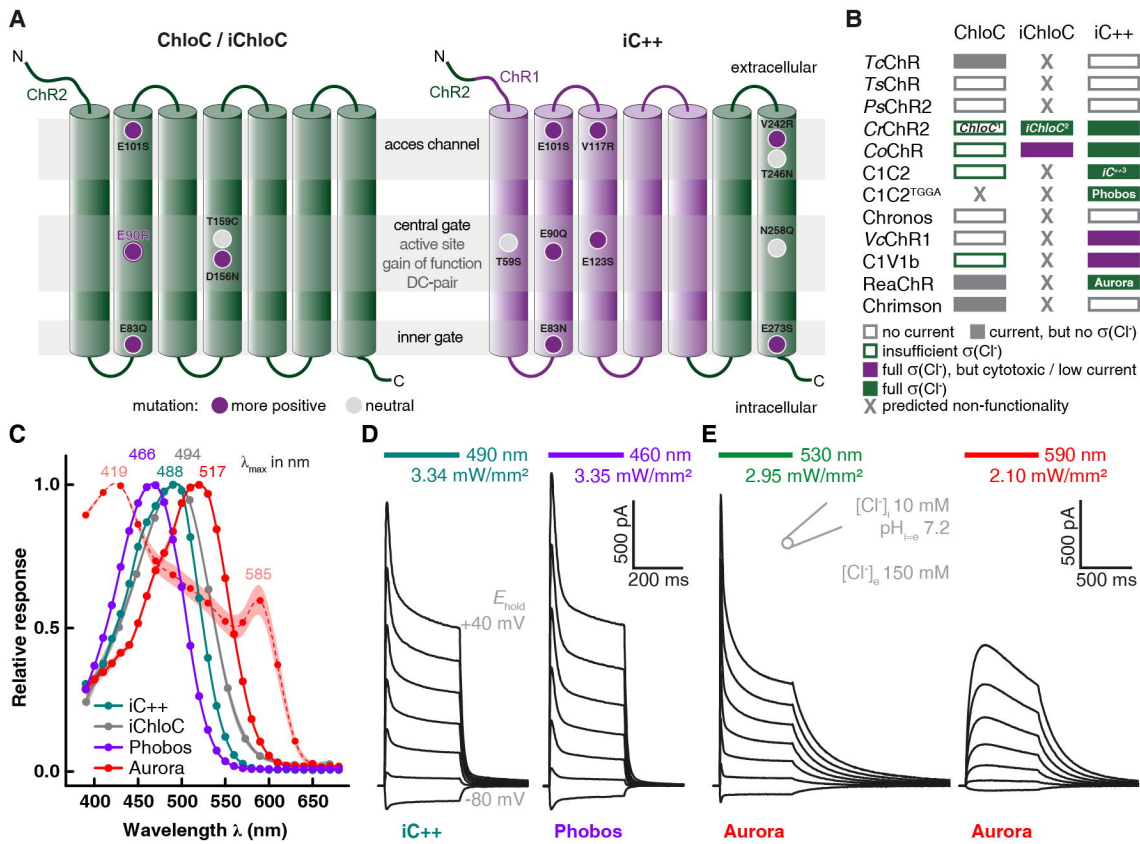

Figure 2

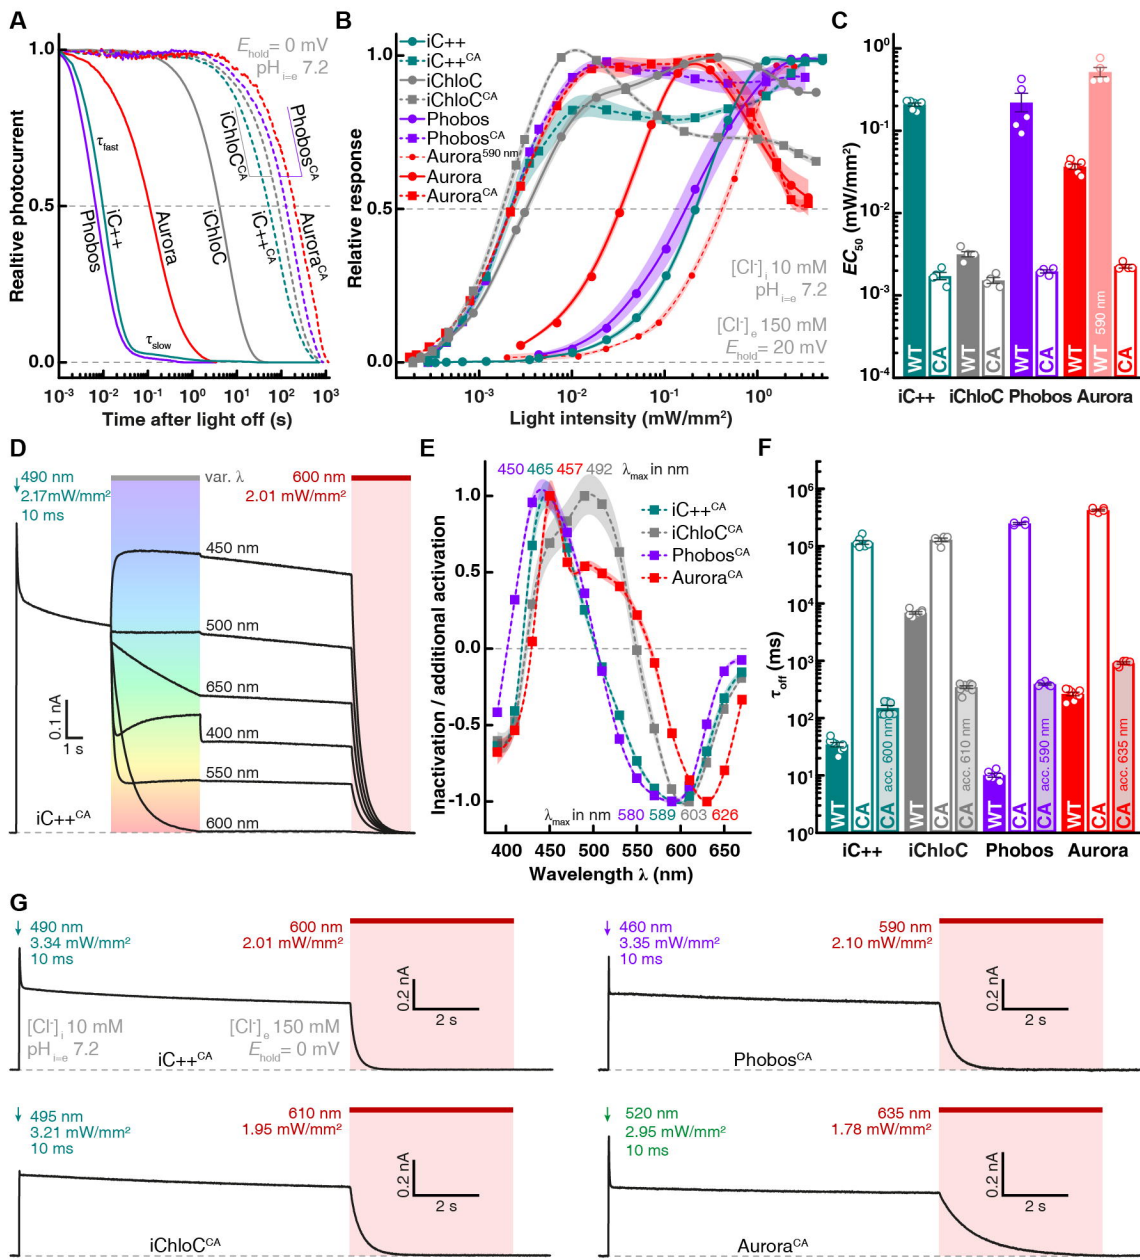

Figure 3

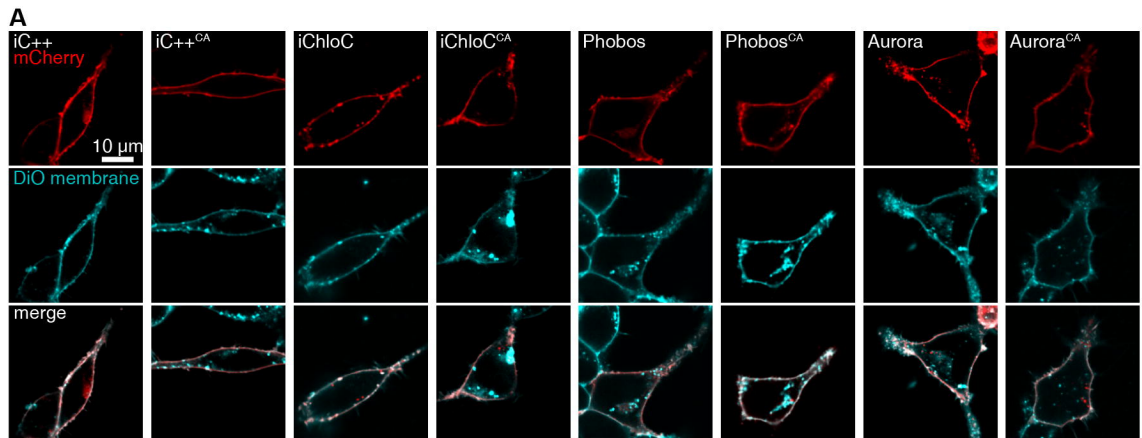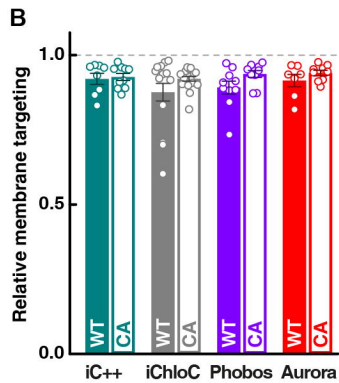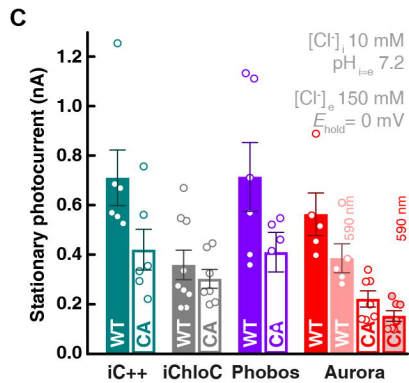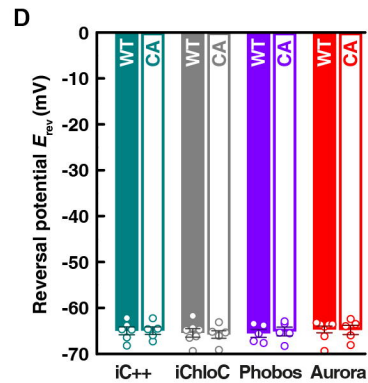

Figure 4

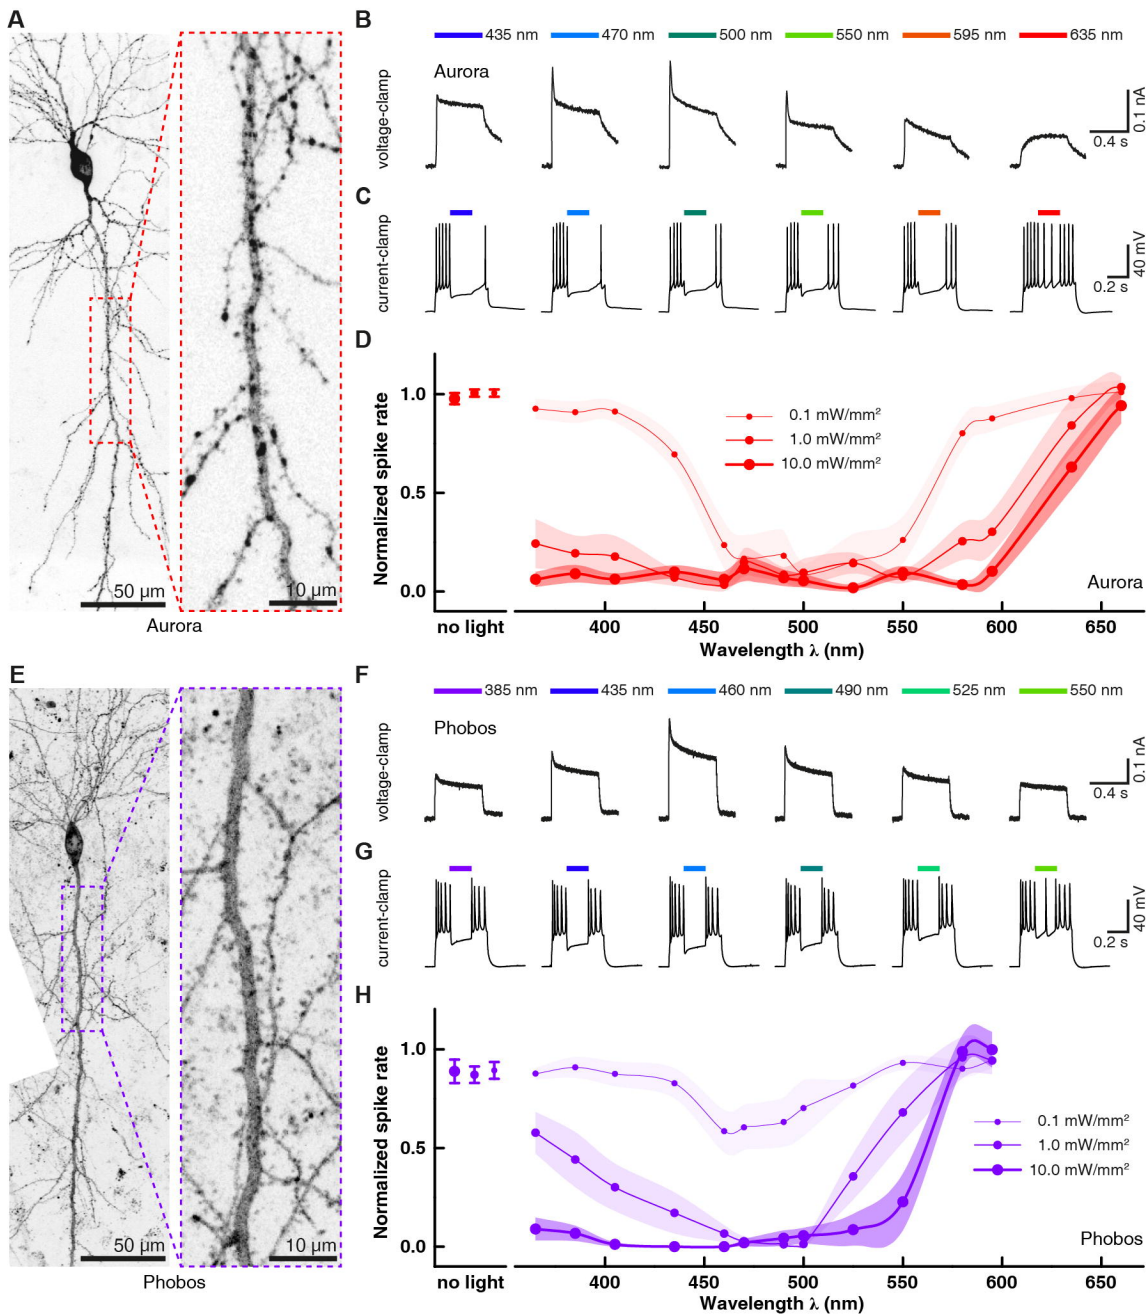

**Figure 5**

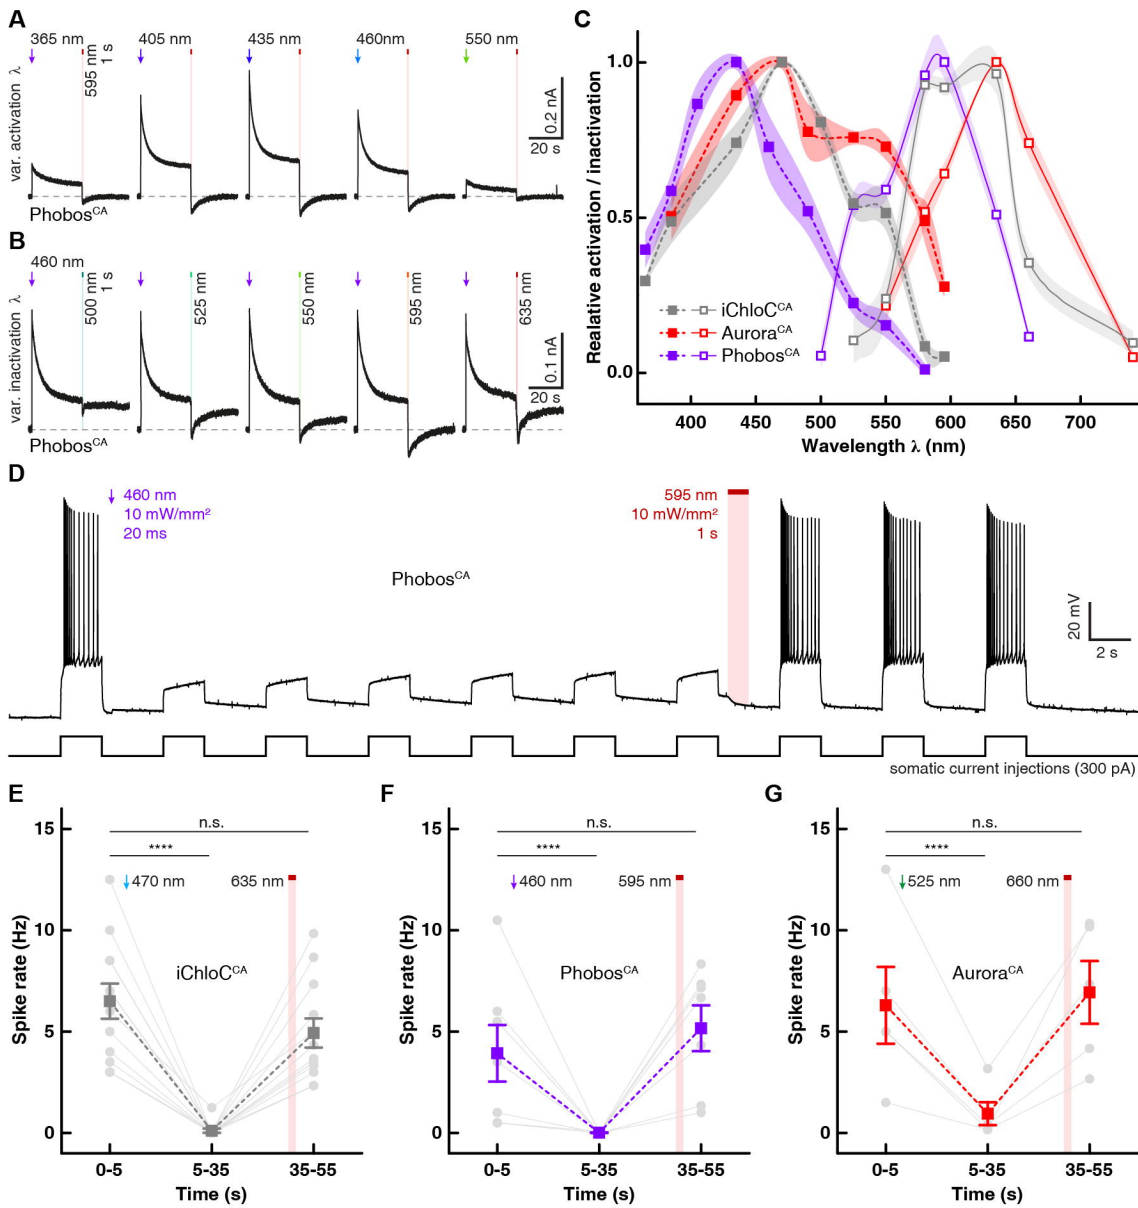



**Figure 6**

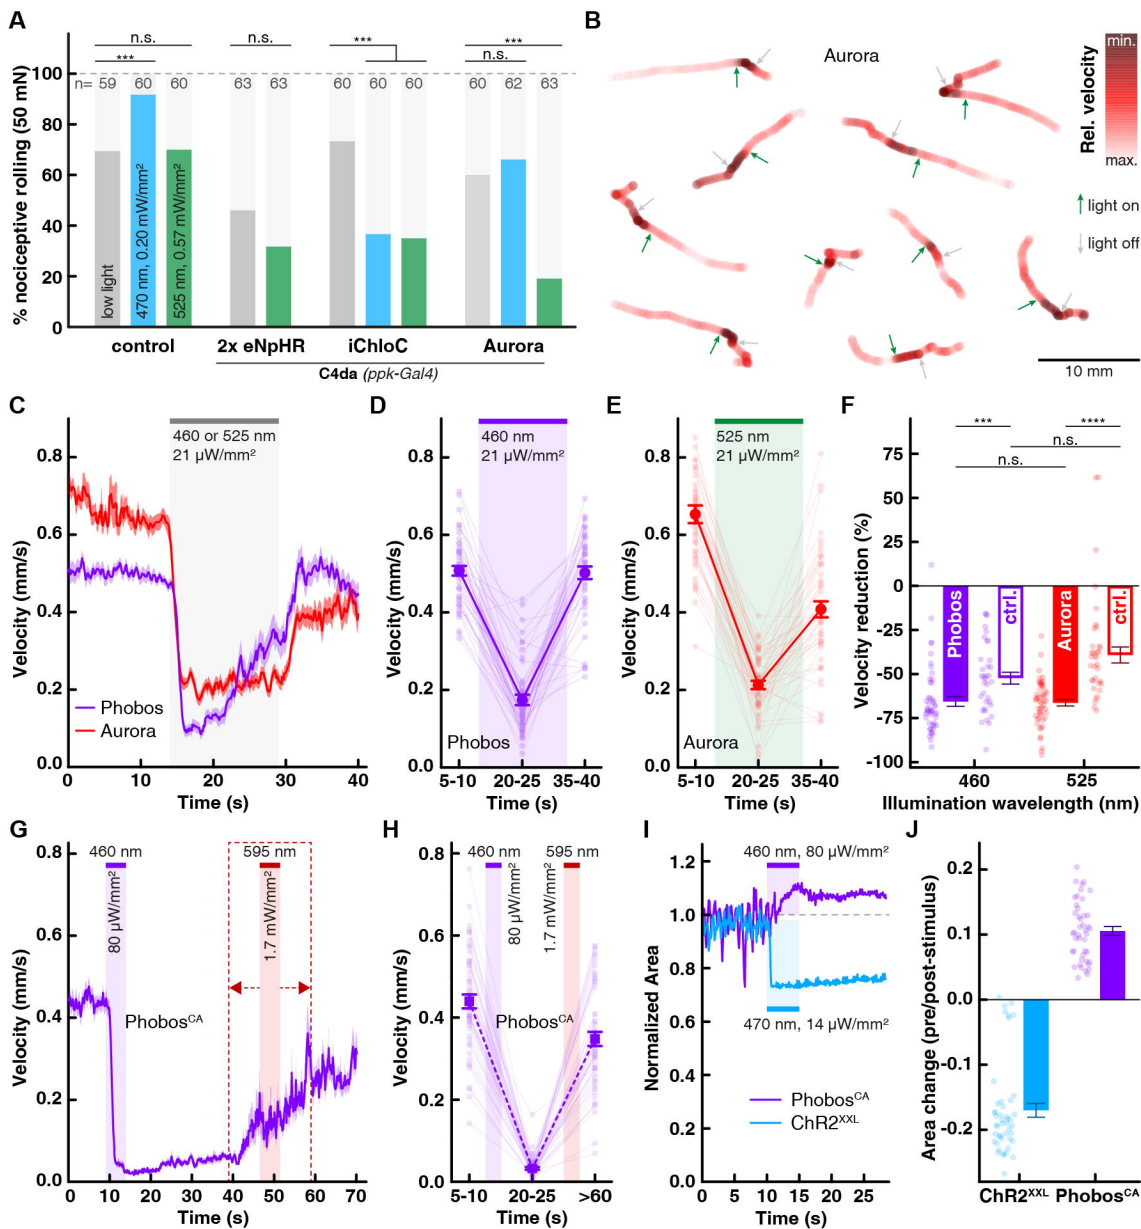

Source: http://www.biorxiv.org/content/10.1101/156422v1.full.pdf
